Title:

## **Floral scents of a deceptive plant are hyperdiverse and under population-specific phenotypic selection**

Authors:

GFRERER Eva<sup>1</sup>, LAINA Danae<sup>1</sup>, GIBERNAU Marc<sup>2</sup>, FUCHS Roman<sup>1</sup>, HAPP Martin<sup>3</sup>, TOLASCH Till<sup>4</sup>, TRUTSCHNIG Wolfgang<sup>5</sup>, HÖRGER Anja C.<sup>1</sup>, COMES Hans Peter<sup>1</sup>, and DÖTTERL Stefan<sup>1\*</sup>

<sup>1</sup> Paris Lodron University of Salzburg, Department of Biosciences, Hellbrunnerstraße 34, 5020 Salzburg, Austria.

<sup>2</sup> CNRS – University of Corsica, Laboratory of Sciences for the Environment, Vignola, Route des Sanguinaires, 20000 Ajaccio, France.

<sup>3</sup> Paris Lodron University of Salzburg, IDA Lab Salzburg, Jakob-Haringer-Straße 6, 5020 Salzburg, Austria.

<sup>4</sup> University of Hohenheim, FG Tierökologie, Garbenstraße 30, 70599 Stuttgart, Germany.

<sup>5</sup> Paris Lodron University of Salzburg, Department of Mathematics, Hellbrunnerstraße 34, 5020 Salzburg, Austria.

\* Corresponding author: Stefan Dötterl; tel.: +43 662 8044 5527; e-mail: stefan.doetterl@sbg.ac.at

Total word count (main text): 3,719

Abstract: 131

Introduction: 822

Results: 1,035

Discussion: 1,871

Materials and Methods: 1,957

Number of Figures: 5; Number of Tables: 1

Supporting information: 2 Figures, 5 Tables, 3 Methods, 1 Note

## ABSTRACT

Floral scent is a key mediator in plant-pollinator interactions; however, little is known to what extent intraspecific scent variation is shaped by phenotypic selection, with no information yet in deceptive plants. We recorded 291 scent compounds in deceptive moth fly-pollinated *Arum maculatum* from various populations north vs. south of the Alps, the highest number so far reported in a single plant species. Scent and fruit set differed between regions, and some, but not all differences in scent could be explained by differential phenotypic selection in northern vs. southern populations. Our study is the first to provide evidence that phenotypic selection is involved in shaping geographic patterns of floral scent in deceptive plants. The hyperdiverse scent of *A. maculatum* might result from the plant's imitation of various brood substrates of its pollinators.

**Key words:** *Arum maculatum*, brood-site deception, chemical ecology, geographic variation, hyperdiverse floral scent, phenotypic selection, Psychodidae

## 1 INTRODUCTION

2 About 88% of angiosperms are cross-pollinated by animals<sup>1</sup> that are attracted to flowers by  
3 multifaceted cues<sup>2</sup>. Together with visual cues, the main attractant for pollinators is floral  
4 scent<sup>3,4</sup>. Therefore, scent has strong effects on pollinator visitation and frequency, and hence  
5 the plant's reproductive success<sup>3,5</sup>. With more than 2,000 floral volatile organic compounds  
6 (VOCs) described<sup>4,6</sup>, and an average of 20–60 VOCs per species<sup>7</sup>, floral scent blends can  
7 tremendously vary among species in terms of composition and quantity. Consequently, they  
8 facilitate discrimination by pollinators among host plant species and contribute to reproductive  
9 isolation of closely related species<sup>8–11</sup>.

10 In addition to interspecific variation, floral scent is also known to vary intraspecifically,  
11 both within and among populations<sup>5,12–16</sup>. Such intraspecific variability might result directly  
12 from abiotic (*e.g.*, temperature<sup>17</sup>, soil chemistry<sup>18,19</sup>) and/or biotic factors (*e.g.*, herbivores<sup>20,21</sup>,  
13 microbes<sup>22</sup>). Given that scent is heritable<sup>23–25</sup>, intraspecific differences can also result from  
14 varying evolutionary forces, such as natural selection and genetic drift<sup>4,26,27</sup>. Although not  
15 explicitly demonstrated, genetic drift was suggested to be responsible for strong inter-  
16 population differences in floral scents<sup>5</sup>, or to counteract pollinator-mediated selection (in two  
17 *Yucca* species<sup>28</sup>). In contrast, natural selection on floral scent emission, both on total scent  
18 amount and on individual scent components, has been shown by analyses of phenotypic  
19 selection, correlating scent phenotypes and fitness measures<sup>29–36</sup>.

20 Phenotypic selection on floral scent can also vary intraspecifically, potentially leading  
21 to variable adaptive responses to spatially variable pollinator assemblages<sup>32,36,37</sup>. Until now,  
22 studies examining phenotypic selection on floral scent have tested rewarding, but not deceptive  
23 species, although the latter also often rely on luring and deceiving their pollinators with  
24 scents<sup>38–40</sup>. Compared to their rewarding relatives, non-rewarding species often display higher  
25 variation in scent and other traits attractive to pollinators<sup>41–43</sup>, and are frequently more pollen-  
26 limited<sup>44–46</sup>. In consequence, they might experience stronger selection on floral scent than  
27 rewarding species, as shown for floral traits other than scent<sup>47</sup>.

28 An ideal target for studying phenotypic selection on scent is the moth fly-pollinated and  
29 brood-site deceptive *Arum maculatum* L. (Araceae), which attracts its pollinators by olfactory  
30 deception. This perennial herb is widespread in Europe and shows high variation in fruit and  
31 seed sets within and among populations<sup>48,49</sup>. The main pollinators are two moth flies (*Psychoda*  
32 *phalaenoides* L. and *P. grisescens* TÖNN., Psychodidae) that are attracted by the strong, dung-  
33 like inflorescence scent of *A. maculatum* while looking for oviposition sites and/or mating  
34 partners<sup>50–52</sup>. Previous analyses have shown that the scent profile of *A. maculatum* consists of

35 up to 60 compounds, also differing among populations<sup>53–58</sup>. At least in part, this scent variation  
36 appears to reflect variation in the pollinator assemblages of *A. maculatum* across its distribution  
37 range<sup>55,58</sup>. In Central and much of Western Europe, high abundances of a single *Psychoda*  
38 species and sex (females of *P. phalaenoides*) were found<sup>52</sup>. In other regions (Mediterranean  
39 Europe and Western France), *A. maculatum* was visited in lower abundances but with a higher  
40 diversity of insects (mostly females of *P. phalaenoides* and both sexes of *P. grisescens*, plus a  
41 few other psychodid species and some other Diptera), also with some variation among  
42 populations<sup>52</sup>. This geographic pollinator variation is particularly pronounced north vs. south  
43 of the Alps<sup>52, Laina, D. et al., unpubl.</sup> and matches a weak genetic (AFLP) subdivision of *A. maculatum*  
44 across this geographic barrier<sup>59</sup>. Presently, it is unclear whether those regional patterns of  
45 pollinator abundance/diversity and genetic variation between populations of *A. maculatum* are  
46 also reflected in their scent patterns. It is known, however, that the two main pollinating moth  
47 fly species have dissimilar floral scent preferences<sup>55,58</sup>. Hence, we assume that the dissimilar  
48 scent preferences of the two fly species, together with their different floral visitation in regions  
49 north vs. south of the Alps, could have led to differing selection pressures on scent among  
50 respective regional populations of *A. maculatum* from north vs. south of the Alps.

51 In this study, we investigated the floral scent characteristics and fruit set (as an indicator  
52 for female fitness) of *A. maculatum* in six populations north of the Alps vs. five populations  
53 south of the Alps and tested for phenotypic selection on scent in the largest and most extensively  
54 sampled population in each of the two regions. Specifically, we asked: (1) Do scent and fruit  
55 set differ between populations north vs. south of the Alps, and among populations within  
56 regions? (2) Is there phenotypic selection on floral scent in each of the most extensively  
57 sampled northern and southern population? And if so, (3) do compounds under selection differ  
58 between these two populations? Considering the differences in pollinator abundance and  
59 diversity between regions, and also among southern, but not northern populations<sup>52</sup>, we expect  
60 to find pronounced population differences in scent, both at the inter-regional level and within  
61 the southern region. When taking also the different olfactory preferences of pollinator species  
62 into account, we additionally expect lower fruit set south than north of the Alps, and different  
63 signs of selection in the most extensively sampled northern and southern populations.

## 64 RESULTS

### 65 Floral scent

66 The total absolute amount of scent was highly variable among the 233 sampled individuals ([Fig.](#)  
67 [1](#)) of *A. maculatum* (range: 1–2,052 ng inflorescence<sup>-1</sup> h<sup>-1</sup>; [Table 1](#)). When taken together,  
68 northern plants released a three-fold lower amount of scent than those from the South, along  
69 with differences among populations within regions (permANOVA: *region*: pseudo- $F_{1,222} =$   
70  $25.70$ , *population* nested within *region*: pseudo- $F_{9,222} = 5.36$ , both  $P < 0.001$ ). For three of the  
71 five southern populations (MAH, MON, LIM), we estimated a median scent amount of *c.* 200  
72 ng inflorescence<sup>-1</sup> h<sup>-1</sup>, while DAO and UDI showed 1.5-fold higher and five-fold lower  
73 amounts, respectively. For three of the six northern populations (MUR, NEC, RÜM),  
74 corresponding median estimates ranged between 40 and 81 ng inflorescence<sup>-1</sup> h<sup>-1</sup>, while in the  
75 remainder amounts were manifold higher (JOS and HOH) or lower (BUR) ([Table 1](#), Supporting  
76 Information Table **S1**).

77 Across all scent samples, we detected a total of 291 floral volatiles (283 north vs. 265  
78 south), and 92 of those could be chemically identified ([Table 1](#), and Supporting Information  
79 Table **S2**). A median of 102 compounds per individual was recorded ([Fig. 2](#)), and the number  
80 of compounds was independent of the region (permANOVA: pseudo- $F_{1,222} = 2.00$ ,  $P = 0.15$ ),  
81 but varied among populations within regions (pseudo- $F_{9,222} = 4.57$ ,  $P = 0.001$ ). At the  
82 population level, between 166 (BUR) and 266 (JOS) compounds were recorded in the North,  
83 and between 88 (MON) and 254 (DAO) in the South ([Fig. 2](#)). The two most extensively sampled  
84 northern (JOS) vs. southern (DAO) populations covered 92% vs. 87% of their respective  
85 regional diversity ([Fig. 2](#)), and together 97% (283/291) of the total number of compounds  
86 ([Table 1](#), and Supporting Information Table **S2**). The five most frequent compounds, found in  
87 more than 99% of the samples, were the nitrogen-bearing compound indole, the  
88 monoterpenoids 3,7-dimethyloct-1-ene and  $\beta$ -citronellene, the sesquiterpenoid  $\beta$ -  
89 caryophyllene, and the unidentified UNK1492 ([Table 1](#)).

90 The absolute amounts of single compounds significantly differed both between regions  
91 (permANOVA: pseudo- $F_{1,222} = 22.52$ ,  $P < 0.001$ ), JOS and DAO only (pseudo- $F_{1,109} = 9.96$ ,  $P$   
92  $< 0.001$ ), and among populations within regions (pseudo- $F_{9,222} = 6.44$ ,  $P < 0.001$ ), but  
93 differences were more pronounced between regions than among populations within regions  
94 (*north* vs. *south* OOB error: 10.3%; among populations within *north* OOB error: 28.3%; within  
95 *south* OOB error: 23.6%). Only a few abundant compounds dominated the scent bouquet of *A.*  
96 *maculatum*, including indole,  $\beta$ -citronellene, the unknown UNK1415, and 3,7-dimethyloct-2-

97 ene (all abundant in both regions), *p*-cresol (most abundant only north), and 2-heptanone (only  
98 south, [Table 1](#)).

99 We also detected differences in the relative amounts of scent compounds between  
100 regions (permANOVA: pseudo- $F_{1,222} = 30.18$ ,  $P < 0.001$ ), JOS and DAO only (pseudo- $F_{1,109} =$   
101  $22.79$ ,  $P < 0.001$ ), and among populations within regions (pseudo- $F_{9,222} = 4.90$ ,  $P < 0.001$ ; [Fig.](#)  
102 [3](#)); but, again, these differences were more pronounced at the inter-regional than within-region  
103 levels (*north* vs. *south* OOB error: 9.0%; among populations within *north* OOB error: 33.9%;  
104 among populations within *south* OOB error: 25.2%; see also Supporting Information Figure  
105 **S1**).

106 Across all populations, variation in absolute or relative amounts of scent could not be  
107 explained by their geographic distances (Mantel's  $Rho = 0.108$ ,  $P = 0.25$  and  $Rho = -0.154$ ,  $P$   
108  $= 0.85$ , respectively).

109 Of the 25 compounds each that were most responsible for regional differences in the  
110 absolute and relative datasets in the *randomForest* analyses, 20 were common to both datasets  
111 (Supporting Information Table **S3**). These 20 included 2-heptanone, 2-heptanol, and  $\alpha$ - and  $\beta$ -  
112 citronellene, all of which were more abundant (in relative and absolute amounts) south of the  
113 Alps, and 1-pentadecanol, the unknown UNK1503, *p*-cresol, and indole, which occurred in  
114 higher amounts north of the Alps ([Table 1](#), and Supporting Information Tables **S2**, **S3**). Many  
115 of these compounds, but also some non-overlapping ones (absolute:  $\alpha$ -copaene,  $\beta$ -  
116 caryophyllene; relative: UNK1409, bicyclogermacrene), explained most of the scent variation  
117 in scent among all samples (for relative data see [Fig. 3](#); for absolute data see Supporting  
118 Information Table **S4**).

119 We also observed considerably high variation in scent within populations, most  
120 prominently in the most extensively sampled northern (JOS) and southern (DAO) populations,  
121 which harboured almost all of the absolute and relative scent variation of their respective region  
122 (for relative data see [Fig. 3](#)).

123

#### 124 **Fruit set**

125 Of the 233 individuals surveyed for inflorescence scent, 113 set fruit in summer. Percentages  
126 of fruit set were significantly higher north of the Alps ( $42 \pm 41\%$  mean  $\pm$  sd, 0–100% Min–  
127 Max) than south of the Alps ( $26 \pm 33\%$  mean  $\pm$  sd, 0–100% Min–Max; [Fig. 4](#); *region*:  $F_{1,209}$   
128  $= 10.11$ ,  $P = 0.002$ ), and differed significantly among populations within regions (*population*  
129 nested within *region*:  $F_{8,209} = 2.23$ ,  $P = 0.03$ ).

## 130 **Phenotypic selection on scent**

131 In the most extensively sampled northern (JOS) and southern (DAO) populations, we tested 19  
132 and three compounds for phenotypic selection, respectively, which correlated with relative fruit  
133 set in the elastic net and *Boruta* analyses (see Material and Methods; Supporting Information  
134 Methods **S3**). Of those 22 compounds, seven showed signals of linear phenotypic selection (two  
135 of which as an interaction), all in the north, and two for nonlinear (quadratic) phenotypic  
136 selection, all in the south ([Fig. 5](#)). Seven of the overall nine compounds that were under  
137 phenotypic selection correlated positively with relative fruit set (linear: 2-heptanol, 2-nonanol,  
138  $\alpha$ -terpinene, UNK681, and UNK1496 together with UNK1503; nonlinear: sabinene), and two  
139 negatively (linear: UNK960; nonlinear: 4-terpinenol; [Fig. 5](#) and Supporting Information Table  
140 **S5**, and Notes **S1**).

141 Of the 25 compounds that most strongly contributed to the absolute (and relative)  
142 differences in scent between the regions each, only four were under selection (north: 2-heptanol,  
143 2-nonanol, UNK681, UNK1503), but not others (*e.g.*, 2-heptanone,  $\alpha$ - and  $\beta$ -citronellene;  
144 Supporting Information Table **S3**). Differences in absolute and relative scent traits between the  
145 northern JOS and the southern DAO remained significant, regardless of performing  
146 PERMANOVA analyses separately on the nine compounds that correlated with relative fruit set  
147 in the elastic net/*Boruta* and were under selection (absolute vs. relative datasets: pseudo- $F_{1,109}$   
148 = 18.4 vs. 30.8, both  $P < 0.001$ ), or on the 93 compounds that were not under selection and did  
149 not correlate with fruit set (absolute vs. relative datasets: pseudo- $F_{1,109} = 9.8$  vs. 24.5, both  $P <$   
150 0.001; see Supporting Information Fig. **S2**, Methods **S3**).

## 151 **DISCUSSION**

152 Our study shows that *Arum maculatum* has hyperdiverse inflorescence scents that differ in their  
153 composition between populations north vs. south of the Alps. Contrary to our expectations,  
154 scent was found to differ not only among southern but also among northern populations. As  
155 expected, individuals from the southern populations had lower fruit set than northern ones, and  
156 different signs of phenotypic selection were found in the most extensively sampled northern  
157 and southern populations.

158

### 159 **Hyperdiversity of floral scent**

160 With 291 floral volatiles recorded, the inflorescence scent diversity of *A. maculatum* is  
161 extraordinarily high and, to the best of our knowledge, not matched by any other plant species.

162 In fact, we are not aware of any species from which more than 200 floral compounds are  
163 reported, a number that a single *A. maculatum* individual can reach by three quarters (max. =  
164 152 VOCs; [Fig. 2](#)). This difference in the number of scent compounds between *A. maculatum*  
165 and other species cannot just be explained by differences in techniques used for scent analyses,  
166 given that scents of a high number of species were analysed using a similar approach as we did  
167 (dynamic headspace and thermal desorption of samples)<sup>60–64</sup>. Species closest to the high number  
168 of VOCs in *A. maculatum* include the sapromyiophilous *Sauromatum guttatum* (Araceae, with  
169 altogether 196 different VOCs<sup>65,66</sup>), as well as the insect-pollinated and rewarding *Geonoma*  
170 *macrostachys* (Arecaceae, 176 VOCs<sup>60</sup>) and *Echinopsis ancistrophora* (Cactaceae, 145  
171 VOCs<sup>67</sup>). Other species for which *c.* 100 VOCs are described likewise include insect-pollinated  
172 and rewarding species (*e.g.*, *Acleisanthes wrightii*, Nyctaginaceae<sup>61</sup>; *Saraca asoca*, Fabaceae<sup>64</sup>;  
173 *Philodendron bipinnatifidum*, Araceae<sup>62</sup>; *Pyrus communis*, Rosaceae<sup>63</sup>), but also the sexually  
174 deceptive orchid *Ophrys sphegodes*<sup>68</sup>. Thus, high numbers of compounds are found across a  
175 wide range of plant families and are apparently not restricted to a specific pollination system.

176 One explanation for the high diversity of scent compounds in *A. maculatum* is that this  
177 species likely imitates its moth fly pollinators' various breeding substrates, all potentially  
178 differently scented. The two main pollinators, *Psychoda phalaenoides* and *P. grisescens*, breed  
179 in a variety of different substrates such as rotting manure from cattle and horse, fungi (*P.*  
180 *grisescens*), waste pits, mud-flats, plant litter in drainages and ditches (*P. phalaenoides*), and in  
181 the hygropetric zones of riverbanks and ponds<sup>69–76</sup>. *Arum maculatum* emits compounds  
182 described from quite a number of such substrates, *e.g.*, cattle and horse manure (*e.g.*, indole, *p*-  
183 cresol, skatole), fungi (1-octen-3-ol, (*E*)-2-octen-1-ol, 3-octanone), and general degrading and  
184 fermenting plant or animal material (*e.g.*, 2,3-heptanedione, acetoin, butanoic acid)<sup>40,77–79</sup>.  
185 Highly specialised deceptive plant systems frequently rely on only a few volatiles to attract  
186 pollinators – they seem to imitate a more specific model, and thus, release less complex scent  
187 blends<sup>*e.g.*, 40,80–83</sup>.

188 The number of volatiles detected across the 233 individuals (11 populations) of *A.*  
189 *maculatum* (291 VOCs) is five to ten times higher than previously reported for this species (18–  
190 61, and 143 VOCs in total<sup>53–58,84</sup>). This discrepancy cannot be explained by differences in  
191 sample size, as a similar number of individuals were surveyed in those previous studies (*n* =  
192 222 in total, representing 23 populations). Interestingly, we found a similar number of  
193 compounds in some individuals (up to 152 VOCs; median of 102; [Fig. 2](#)) as overall detected  
194 previously<sup>53–58,84</sup>. With the exception of two studies<sup>56,58</sup>, each sharing one of our sampled  
195 populations (JOS and MON, respectively), all previous studies sampled scents in other



196 populations across Europe<sup>53–55,57</sup>. Thus, some of the differences in the number of *A. maculatum*  
197 compounds detected across studies might reflect population-specific scent characteristics (see  
198 [Fig. 2](#)). More importantly, however, we believe that the discrepancy in the number of  
199 compounds recorded largely reflects differences in methodology between the present and  
200 previous studies. These are, for example, higher sensitivity of modern GC/MS systems; usage  
201 of more selective adsorbent agents (Carbotrap/Tenax-TA vs. solid-phase micro-extraction<sup>55,57</sup>  
202 vs. Twister<sup>58</sup>); *in situ* vs. *ex situ* sampling<sup>56,84</sup>; and including all vs. only compounds above a  
203 specific threshold in relative amounts<sup>55,58</sup>. Of the 92 compounds chemically identified in this  
204 study, more than half (50) were previously unknown to be released by *A. maculatum*. Some of  
205 these newly described compounds for *A. maculatum* are known from other species of Araceae  
206 (e.g., nerol, (*E,E*)- $\alpha$ -farnesene, 6-methyl-5-heptene-2-ol,  $\gamma$ -terpinene; *Sauromatum guttatum*<sup>65</sup>,  
207 *Anthurium* spp.<sup>85,86</sup>) or other plant families (e.g., methyl anthranilate, isobutyl butyrate,  
208 citronellal<sup>4,6</sup>). However, this study is, to the best of our knowledge, the first to identify *p*-cresyl  
209 butyrate as a floral scent compound.

210

### 211 **Geographic patterns of floral scent**

212 The qualitative, absolute, and relative differences in scent among populations of *A. maculatum*  
213 from south of the Alps may be explained by the fact that the pollinator assemblages there are  
214 more diverse in terms of abundance, species composition, and sex ratio<sup>52, Laina, D. et al., unpubl.</sup>. North  
215 of the Alps, females of *P. phalaenoides* are the principal pollinators in all studied populations<sup>52</sup>.  
216 Laina, D. et al., unpubl., even though other *Psychoda* sp. also occur in this region<sup>55,71, Laina, D. et al., unpubl.</sup>,  
217 hence, the scent variation we observed among northern populations is not reflected by variations  
218 in pollinator spectra in this region. In the present study, all variations in scent were more  
219 pronounced between regions than among populations within each region. This strong regional  
220 component of scent variation in *A. maculatum* across the Alps thus accords with strong  
221 differences in pollinator spectra<sup>52, Laina, D. et al., unpubl.</sup>, but also coincides with a weak genetic  
222 (AFLP) subdivision of *A. maculatum* across this geographic barrier<sup>59</sup>. Previous studies in *A.*  
223 *maculatum* also found population effects in scent composition<sup>55,57,58</sup>; however, our study is the  
224 first to demonstrate such population differentiation in scent across the Alps. Intraspecific  
225 variation in floral scent among populations and regions has also been reported for other plant  
226 species<sup>14,15,34,37,67</sup>. In some of those, this variation, as in our study, could be linked to pollinator  
227 assemblages and/or genetic patterns<sup>15,34,37</sup>, but not in others<sup>14,67</sup>.

## 228 **Phenotypic selection on floral scents**

229 The two most extensively sampled northern (JOS) and southern (DAO) populations differed in  
230 absolute and relative amounts of scent, regardless of whether the analyses were conducted on  
231 all compounds, only on those that correlated with relative fruit set and were under selection, or  
232 those that did not correlate with fruit set (Material and Methods, Supporting Information Fig.  
233 **S2**). Thus, this regional difference in scent could be caused by different selection regimes, as  
234 well as other reasons, such as phenotypic plasticity (but see<sup>58</sup>) or genetic drift<sup>87,88</sup>. In support of  
235 differential selection, we detected population-specific signatures of phenotypic selection on  
236 scent in JOS and DAO, possibly due to different olfactory preferences of those *Psychoda*  
237 species that dominate the pollinator spectra of *A. maculatum* in the northern (female *P.*  
238 *phalaenoides*) vs. southern (and *P. grisescens*) regions<sup>52,55,58,Laina, D. et al., unpubl.</sup>.

239 For the five compounds under phenotypic selection that we were able to chemically  
240 identify (*i.e.*, 2-nonanol, 2-heptanol, sabinene, 4-terpinenol and  $\alpha$ -terpinene), information on  
241 their attractiveness to pollinators of *A. maculatum* is lacking. However, the aliphatic compounds  
242 2-heptanol and 2-nonanol are known, together or alone, as attractants for bees (Meliponini<sup>89,90</sup>)  
243 and kleptoparasitic flies<sup>91</sup>, and as (sex-)pheromones of female Diptera (Cecidomyiidae<sup>92</sup>) and  
244 female non-Diptera (Trichoptera<sup>93</sup>). The monoterpenoids sabinene,  $\alpha$ -terpinene, and 4-  
245 terpinenol are defence substances of some insects (Coleoptera<sup>94,95</sup>, Lepidoptera<sup>96</sup>) that repel  
246 Coleoptera<sup>97</sup>, but are used by Hymenoptera<sup>98</sup> and Lepidoptera<sup>99</sup> for host-finding and as  
247 oviposition stimulants. The latter two are also pheromones of fruit flies<sup>100</sup>. In summary, these  
248 five compounds, found to be under phenotypic selection, elicit responses in insects other than  
249 moth flies. Further, they are known as floral scent from other sapromyophilous  
250 species<sup>65,66,77,81,101,102</sup>, and some of them ( $\alpha$ -terpinene and 4-terpinenol) are also known from  
251 cattle dung<sup>79,103</sup>, *i.e.*, one of the oviposition substrates of moth flies. Further research is required  
252 to establish whether these five compounds, which are all widespread floral scent compounds<sup>4,6</sup>,  
253 are attractive to the pollinators of *A. maculatum*.

254 Several of the compounds most responsible for regional differences in inflorescence  
255 scent (*e.g.*, 2-heptanone, 3,7-dimethyloct-1-ene, UNK966; Supporting Information Table **S3**)  
256 did not show signals of phenotypic selection (**Fig. 5**). Thus, the different selection regimes  
257 cannot explain several of the obvious differences in scent between *A. maculatum* from north  
258 and south of the Alps (see also Supporting Information Fig. **S1**). Some other compounds,  
259 however, which also differed in their absolute amounts between regions (2-heptanol, 2-nonanol,  
260 UNK681, sabinene; Supporting Information Table **S3**, **S5**) were under phenotypic selection,

261 either in northern JOS or southern DAO ([Fig. 5](#)), and some of the differences between regions  
262 could therefore be due to differential selection.

263 Somewhat unexpectedly, we did not find phenotypic selection for the most abundant  
264 compounds in the scent of *A. maculatum* (e.g., indole,  $\beta$ -citronellene, unknown UNK1415),  
265 with the exception of 2-heptanol ([Fig. 5](#)). Even more surprisingly, we also did not find  
266 phenotypic selection for those compounds known to attract *P. phalaenoides* (i.e., indole, 2-  
267 heptanone, *p*-cresol,  $\alpha$ -humulene<sup>50,84</sup>), occurring both north and south of the Alps, and also in  
268 JOS and DAO<sup>52</sup>. This is in contrast to most other studies, where main compounds and/or  
269 pollinator attractants<sup>29,32,33,35</sup> showed signals of phenotypic selection (but see<sup>31,34</sup>). Possible  
270 explanations for not finding phenotypic selection on the main compounds of *A. maculatum*  
271 include: (1) their release in amounts high enough to achieve maximum pollinator attractiveness  
272 (see also<sup>34</sup>); (2) opposing selection pressures on these compounds by different pollinators or  
273 herbivores, resulting in zero ‘net’ selection<sup>33,34</sup>; or that (3) their relationship with flower visitors  
274 is nonlinear and nonquadratic<sup>104–106</sup>. Although our multivariate models detected nonlinear  
275 phenotypic selection by including quadratic terms, such quadratic analyses cannot uncover all  
276 potential nonlinear relationships (e.g.,<sup>107</sup>). Hence, we cannot exclude the possibility that such  
277 abundant and/or attractive compounds are still under phenotypic selection, which in turn calls  
278 for future statistical developments that allow testing for any kind of nonlinear multivariate  
279 relationships.

280 Deceptive plant species might experience stronger selection than rewarding ones<sup>47</sup>.  
281 However, by comparison with rewarding species<sup>30–36</sup>, we found that deceptive *A. maculatum*  
282 does not release a higher number of volatiles with signatures of phenotypic selection (7% vs.  
283 3–42%), but they appear to be under slightly stronger positive linear phenotypic selection (-  
284 0.3–0.5 vs. -0.3–0.4<sup>30–35</sup> Min–Max) and stronger nonlinear phenotypic selection (-0.9–9.0 vs.  
285 -0.5–-0.3<sup>36</sup> Min–Max; [Fig. 5](#)). Future studies on other deceptive plant species that also attract  
286 specific pollinators by chemical cues but have lower levels of fruit set than *A. maculatum* (such  
287 as many orchids<sup>44,45</sup>) might reveal even stronger signatures of phenotypic selection.

288

## 289 **Conclusions**

290 Our study on sapromyiophilous *Arum maculatum* reports the highest number of floral volatiles  
291 ever found in a single plant species to date. This chemical hyperdiversity could be due to the  
292 fact that this brood-site deceptive plant species imitates the odours of a multitude of differently  
293 scented breeding substrates of its moth fly pollinators (e.g., dung, fungi, rotting plant material).  
294 We recorded pronounced scent differences between populations from north vs. south of the

295 Alps, and this geographic pattern in scent agrees with previously described pollinator and  
296 genetic patterns across this geographic barrier. Our results provide, for the first time, evidence  
297 that floral scents of a deceptive plant are under phenotypic selection and suggest that  
298 populational/regional differences in scent are partly due to differential selection, while other  
299 reasons, such as phenotypic plasticity and genetic drift cannot be excluded. In *A. maculatum*  
300 and other plants where phenotypic selection on scent was demonstrated<sup>29–36</sup>, the biological role  
301 of most compounds under selection is unknown and awaits determination in future studies.

## 302 **MATERIALS AND METHODS**

### 303 **Study species and populations**

304 Brood-site deceptive *Arum maculatum* L. (Araceae) is a rhizomatous perennial woodland herb  
305 ( $2n = 4x = 56$ ) that is widespread throughout Western and Central Europe, including the British  
306 Isles, and reaches as far south as Italy, Northern Spain, and the Balkans<sup>52,108,109</sup>. It exhibits a  
307 sapromyiophilous pollination strategy, is thermogenically active, and emits a strong dung-like  
308 scent for attracting moth fly pollinators during the evening on the first day of anthesis<sup>53,56,110,111</sup>.  
309 The inflorescence of *Arum maculatum* consists of a spadix (fleshy spike) and a spathe (bract),  
310 is protogynous, and the anthesis lasts less than two days<sup>51,56,110</sup>. The spathe, which completely  
311 encloses the spadix during floral development, partially opens during anthesis to reveal the  
312 sterile appendix of the apical part of the spadix. This appendix produces and releases the scent  
313 for pollinator attraction<sup>50,51,53,84</sup>. At the base of the spadix, female (fertile and sterile) flowers  
314 are situated lowest, followed upwards by male flowers and staminodes (sterile male flowers).  
315 All flowers remain enveloped by the spathe during anthesis, forming a chamber that is closed  
316 by the staminodes throughout the female stage to prevent trapped insects from leaving.  
317 Pollinators are attracted in the evening on the first day of anthesis, during the female stage, slip  
318 and fall into the floral chamber, and are trapped overnight<sup>51,52,55,111</sup>. On the next morning, during  
319 the male stage, they are dusted with pollen, before being released at around noon when the  
320 staminodes and spathe wither<sup>51,52,110</sup>. After pollination in spring, red berry-like fruits develop  
321 as an infructescence until summer<sup>112</sup>.

322 In 2017–2019, during springtime, we collected scent from randomly chosen *A.*  
323 *maculatum* individuals of six populations located north of the Alps ( $n = 106$ ; Northwestern  
324 Austria: JOS; Central/Southern Germany: BUR, HOH, MUR, NEC; Northern Switzerland:  
325 RÜM) and five populations from south of the Alps ( $n = 127$ ; Northern Italy: DAO, LIM, MAH,  
326 MON, UDI) ([Fig. 1](#)). We kept a minimum distance of one metre between sampled individuals

327 to avoid sampling potential clones, as *A. maculatum* can propagate vegetatively by fragmenting  
328 rhizomes<sup>51</sup>. In summer, we harvested fruits from all individuals surveyed for scent. At most  
329 sites, we recorded fruit set of 15 individuals, except for each of the largest population per region  
330 (JOS and DAO;  $n = 70$  each), and a northern population (HOH;  $n = 7$ ) where only a few  
331 individuals had flowered at the time of scent sampling ([Fig. 1](#) and Supporting Information Table  
332 **S1**).

333

### 334 **Plant volatile collection and analysis**

335 Scent sampling took place on the first day of anthesis during the female stage between 6 pm  
336 and 7.30 pm, the period of maximum scent emission<sup>56</sup>, employing a non-invasive dynamic  
337 headspace technique. We enclosed each inflorescence *in situ* using an odourless plastic oven  
338 bag (c. 30×12 cm; Toppits®, Melitta, Germany) and immediately collected scent for five  
339 minutes at 200 ml min<sup>-1</sup> on adsorbent tubes (inner diameter: 2 mm) filled with a mixture of  
340 Tenax-TA (mesh 60–80) and Carbotrap B (mesh 20–40; 1.5 mg each; both Supelco, Germany),  
341 using a battery-operated vacuum pump (rotary vane pump G12/01 EB, Gardner Denver Austria  
342 GmbH, Vienna, Austria)<sup>56</sup>. In the same way, we collected scent samples from leaves and  
343 ambient air as negative controls in each population.

344 The dynamic headspace samples were analysed by thermal desorption-gas  
345 chromatography/mass spectrometry (TD-GC/MS)<sup>56</sup>, and obtained data were handled using  
346 *GCMSolution* v.4.41 (Shimadzu Corporation, Kyoto, Japan) (for details see Supporting  
347 Information Method **S1**). Compounds were chemically identified by comparison of Kováts'  
348 retention indices (KRIs<sup>113</sup>), based on commercially available *n*-alkanes (C<sub>7</sub>–C<sub>20</sub>), and mass  
349 spectra to data available in the libraries of Adams<sup>114</sup>, FFNSC 2, Wiley9, NIST11, and  
350 ESSENTIAL OILS (available in *MassFinder* 3, Hochmuth Scientific Consulting, Hamburg,  
351 Germany). We established an own library of mass-spectral and KRIs for semi-automatic  
352 analysis (Supporting Information Method **S1**). Whenever possible, compounds were verified  
353 by comparison to authentic reference standards available in the collection of the Plant Ecology  
354 Lab of Salzburg University, or to chemically synthesised reference compounds (Supporting  
355 Information Method **S2**). Of the 267 collected scent samples, 233 yielded a sufficiently  
356 informative chromatogram and were included in the analysis ([Fig. 1](#)). Ultimately, a compound  
357 was only considered if it occurred in more than three scent samples and did not occur in leaf  
358 and air controls.

## 359 **Fruit set**

360 Percentage fruit set (*i.e.*, number of fruits/total number of flowers per individual  $\times$  100) was  
361 determined as a measure of female reproductive success. For selection analyses we further  
362 estimated relative fruit set (*i.e.*, number of fruits per individual/ mean number of fruits per given  
363 population) as a measurement of female reproductive success<sup>32,35</sup>, standardised per population  
364 for the most extensively sampled populations JOS and DAO. In one southern population  
365 (MON), a shallow landslide destroyed all plants, with the exception of one; hence, this  
366 population was excluded from fruit set analyses.

367

## 368 **Statistical analyses**

369 **Geographic patterns in scent and fruit set data.** In order to test for geographic differences in  
370 floral scent, we performed permutational multivariate analyses of variance (perMANOVAs<sup>115</sup>)  
371 as implemented in the R package *vegan* v.2.6-6<sup>116</sup>. We did this on (1) pairwise Bray–Curtis  
372 dissimilarities of either absolute or relative scent data (*i.e.*, absolute amount of single  
373 compounds or relative amount of single compounds in relation to the total amount of scent in a  
374 sample, respectively); and (2) Euclidean distances of both total absolute emission of scent and  
375 of total number of floral volatiles per individual. In all these analyses, we used *region* (north  
376 vs. south of the Alps) and *population* nested in *region* as explanatory variables (9,999  
377 permutations). Using perMANOVA (*population* as explanatory variable, 9,999 permutations),  
378 we also tested for differences in relative and absolute scent, and for geographic patterns of  
379 selection in the two most extensively sampled northern (JOS) and southern (DAO) populations.  
380 To this aim, we either used all compounds, or only those that were under selection and  
381 correlated with relative fruit in the *elastic net/Boruta* (see below and Supporting Information  
382 Methods **S3**), or those that were not under selection and did not correlate with relative fruit set.

383 The Bray–Curtis dissimilarity matrices (based on absolute and relative scent data across  
384 all populations) were further used to conduct constrained analyses of principal coordinates  
385 (CAP<sup>117</sup>) with *population* as factor, using the *capscale* function in *vegan* to visualize similarities  
386 and dissimilarities in scent among the samples (following<sup>118,119</sup>). For each ordination, we also  
387 calculated vectors, representing compounds most correlating with the axes (Pearson  
388 correlations with *capscale scores*,  $r > |0.5|$ , corrected for false-discovery rate<sup>120</sup>). Given that  
389 CAP is not appropriate to display similarities and dissimilarities in scent between only two  
390 populations in a two-dimensional ordination, we used non-metric multidimensional scaling  
391 (nMDS) to visualize similarities and dissimilarities in scent among the samples of only JOS and  
392 DAO, using only compounds that correlated with relative fruit set or those that did not.

393 Additionally, we subjected the absolute and relative scent data to random forest  
394 analyses<sup>121</sup> by the R package *randomForest* v.4.6-14<sup>122</sup> (*ntree* = 9,999 bootstrap samples with  
395 *mtry* = 17) to evaluate the distinctness in scent of northern and southern samples (factor *region*)  
396 and among populations within each region (factor *population*)<sup>123</sup>. Distinctness was quantified  
397 as the average out-of-bag (OOB) error estimate (in %), *i.e.*, the more distinct, the lower the  
398 OOB error. From the resulting *randomForest* objects, we further extracted the *importance*  
399 measurements to determine volatiles that are critical for regional distinction.

400 To test for relationships between the dissimilarity of median absolute and relative scent  
401 properties of populations and their geographic distances (in km), we performed Mantel tests  
402 with the function *mantel* in *vegan* (9,999 permutations, Spearman's rank correlation). To assess  
403 whether absolute amounts of single compounds under selection (see below) differ between the  
404 two regions, we performed Mann–Whitney U tests. Differences in fruit set across regions and  
405 among populations within regions were assessed by a generalised linear model (*regions* and  
406 *populations* nested within *regions* as factors) that was analysed by an ANOVA.

407  
408 **Analyses of phenotypic selection.** To estimate the direction and strength of phenotypic  
409 selection on scent compounds, we tested for phenotypic selection<sup>124</sup> in the northern JOS and  
410 southern DAO by correlating relative fruit set with z-transformed scent data (standardised to  
411 mean = 0, sd=1)<sup>30–32,35</sup>. These two populations cover a large part of their respective  
412 corresponding regional scent variation (see [Fig. 3](#)). As a major challenge, our dataset has a  
413 considerable higher number of factors (VOCs) than samples. Previous studies solved this by  
414 pre-selecting variables to reduce high dimensionality<sup>30,31,34</sup>, and performed selection analyses  
415 only on the most abundant compounds<sup>29,33</sup>, on principal component scores<sup>29,32,35</sup>, or on  
416 physiologically active volatiles<sup>34</sup>. Because we only have very limited knowledge of attractive  
417 compounds in our study system<sup>50,84</sup>, the assumptions for principal component analysis are  
418 violated, and as also minor volatiles can be under selection<sup>34</sup>, these solutions were not suitable  
419 for our dataset. Instead, we pre-selected volatiles that correlate with relative fruit set via elastic  
420 net, *i.e.*, a penalised multivariate linear regression<sup>125</sup>, and via the *Boruta*<sup>126</sup> algorithm, to identify  
421 linear (elastic net) and nonlinear (*Boruta*) relationships between total absolute emission as well  
422 as the absolute emission of individual volatiles and relative fruit set (for details see Supporting  
423 Information Methods **S3**). Additionally, the scent matrix contained many zeros (non-detects),  
424 as many compounds were quite rare (*c.* 70% of VOCs in < 50% of samples). This zero-inflation  
425 can cause severe problems when fitting linear models, as estimates will be biased<sup>127</sup>. That is,  
426 the influence of an individual scent compound on fruit set can be either over- or underestimated,

427 leading to potentially wrong conclusions. To quantify the impact of non-detects on elastic net  
428 estimates, we performed, before the pre-selective analyses, a simulation study for JOS and DAO  
429 separately (see Supporting Information Methods **S3**). Based on the simulation results, we  
430 obtained 93 and 81 scent compounds for JOS and DAO, respectively, each of which were then  
431 included in both the elastic net regression and the *Boruta* analyses (Supporting Information  
432 Methods **S3**). For the JOS population, elastic net and *Boruta* identified 19 and four volatiles,  
433 respectively; whereby the latter were already among the linear ones ([Fig. 5](#)). In the southern  
434 DAO population, no volatile correlated with fruit set in the elastic net, but three in the *Boruta*  
435 analysis. None of these volatiles was detected for both populations ([Fig. 5](#)). Also, total absolute  
436 scent amount did not correlate with fruit set in any of the analyses.

437 To ultimately test for phenotypic selection, we subjected those variables selected by the  
438 elastic net model (Supporting Information Methods **S3**) to multivariate linear regression (linear  
439  $\beta$ -gradients)<sup>124</sup>, and those volatiles identified by the *Boruta* analyses (Supporting Information  
440 Methods **S3**) to multivariate quadratic regression (nonlinear/quadratic  $\gamma$ -gradients<sup>124</sup>) by  
441 squaring the terms and doubling resulting estimates<sup>107</sup>. For the multivariate regression model  
442 of the southern (DAO) population, we excluded the plant individual ‘DAO076’, as it was  
443 determined by Cook’s distance<sup>128</sup> as an outlier influencing the model ( $D_{\text{DAO076}} = 235.4$ ).  
444 Although elastic net handles multicollinearity well, volatiles identified to correlate with fruit  
445 set might still correlate with each other ( $L_2$  penalty, see Supporting Information Methods **S3**).  
446 We therefore also tested for multicollinearity within the multivariate regression models by  
447 calculating the variance inflation factor (VIF) (R package *car* v.3.0.8<sup>129</sup>) for each scent  
448 compound in each model. For the northern (JOS) model, the VIF value of various compounds  
449 was high ( $> 5$ ) and for the unknowns UNK1496 and UNK1503 even exceeded 10, a threshold  
450 that indicates strong multicollinearity<sup>130</sup>. After including these two compounds as an  
451 interaction, the VIF values of most compounds were  $< 5$ , except for 3-octanol and UNK1279  
452 (VIF  $> 6$ ). After further including the interaction of the latter two volatiles in the model, the  
453 VIF values of all volatiles were  $< 4$ . Based on this, the final northern (JOS) model had an  
454 adjusted  $R^2$  of 0.71. For the southern (DAO) model, all VIF values were  $< 2$  (adjusted  $R^2 =$   
455 0.26). All statistical analyses were performed in R v.4.0.2<sup>131</sup>.



## **Acknowledgements**

We would like to thank Irmgard Schäffler for methodological support, Valerie Scheurecker, Karin Moosbrugger, Bernadette Mükisch, S. Sophie Brandauer and Christopher Gorofsky for their support in the field, and Florian Schiestl for providing data on populations in Switzerland. We also thank Robert A. Raguso for discussing hyperdiverse scents, and members of the Plant Ecology group of the University of Salzburg, especially Karin Gross and Herbert Braunschmid, for constructive comments on an earlier version of the manuscript. This study was funded by a grant from FWF (Austrian Science Fund; P30175-B29) to ACH, HPC and SD (PI). MH and WT gratefully acknowledge support from the WISS 2025 project ‘IDA-lab Salzburg’ (20204-WISS/225/197-2019 and 20102-F1901166-KZP).

## **Author Contributions**

SD, MG, ACH and HPC designed the research; EG and DL conducted the fieldwork; RF executed the scent sample laboratory work; EG and SD built the scent library, and EG analysed all scent and fruit set data; TT identified and synthesised unknown compounds; MH, WT, RF, SD and EG discussed statistical approaches for selection analyses; MH designed and performed the simulations, EG the selection analyses; EG wrote the first draft of the manuscript and all authors contributed to the final version.

## **Data Availability**

The R code for the simulation and the scent data that support the findings of this study will be available in the Dryad Digital Repository and are now available on request.

**The authors declare no competing interests.**

## **Additional Information:**

**Supporting Information** is available for this paper.

## REFERENCES

1. Ollerton, J., Winfree, R. & Tarrant, S. How many flowering plants are pollinated by animals? *Oikos* **120**, 321–326 (2011).
2. Chittka, L. & Thomson, J. D. *Cognitive ecology of pollination: Animal behavior and floral evolution*. (Cambridge University Press, 2001).
3. Raguso, R. A. Wake up and smell the roses: The ecology and evolution of floral scent. *Annu. Rev. Ecol. Evol. Syst.* **39**, 549–569 (2008).
4. Knudsen, J. T., Eriksson, R., Gershenzon, J. & Ståhl, B. Diversity and distribution of floral scent. *Bot. Rev.* **72**, 1–120 (2006).
5. Delle-Vedove, R., Schatz, B. & Dufay, M. Understanding intraspecific variation of floral scent in light of evolutionary ecology. *Ann. Bot.* **120**, 1–20 (2017).
6. El-Sayed, A. M. *The Pherobase: database of pheromones and semiochemicals*. <https://www.pherobase.com> (2019).
7. Knudsen, J. T. & Gershenzon, J. The chemical diversity of floral scent. in *Biology of Plant Volatiles* (eds. Pichersky, E. & Dudareva, N.) 57–78 (CRC Press, 2020).
8. Kunze, J. & Gumbert, A. The combined effect of color and odor on flower choice behavior of bumble bees in flower mimicry systems. *Behav. Ecol.* **12**, 447–456 (2001).
9. Okamoto, T., Kawakita, A. & Kato, M. Interspecific variation of floral scent composition in *Glochidion* and its association with host-specific pollinating seed parasite (*Epicephala*). *J. Chem. Ecol.* **33**, 1065–1081 (2007).
10. Stöckl, J. *et al.* Speciation in sexually deceptive orchids: Pollinator-driven selection maintains discrete odour phenotypes in hybridizing species. *Biol. J. Linn. Soc.* **98**, 439–451 (2009).
11. Friberg, M., Schwind, C., Roark, L. C., Raguso, R. A. & Thompson, J. N. Floral scent contributes to interaction specificity in coevolving plants and their insect pollinators. *J. Chem. Ecol.* **40**, 955–965 (2014).
12. Tollsten, L. & Bergström, L. G. Fragrance chemotypes of *Platanthera* (Orchidaceae) - the result of adaptation to pollinating moths? *Nord. J. Bot.* **13**, 607–613 (1993).
13. Azuma, H., Toyota, M. & Asakawa, Y. Intraspecific variation of floral scent chemistry in *Magnolia kobus* DC. (Magnoliaceae). *J. Plant Res.* **114**, 411–422 (2001).
14. Dötterl, S., Wolfe, L. M. & Jürgens, A. Qualitative and quantitative analyses of flower scent in *Silene latifolia*. *Phytochemistry* **66**, 203–213 (2005).
15. Soler, C. *et al.* Geographic variation of floral scent in a highly specialized pollination mutualism. *Phytochemistry* **72**, 74–81 (2011).
16. Friberg, M., Schwind, C., Raguso, R. A. & Thompson, J. N. Extreme divergence in floral scent among woodland star species (*Lithophragma* spp.) pollinated by floral parasites. *Ann. Bot.* **111**, 539–550 (2013).
17. Farré-Armengol, G., Filella, I., Llusà, J., Niinemets, Ü. & Peñuelas, J. Changes in floral bouquets from compound-specific responses to increasing temperatures. *Glob. Chang. Biol.* **20**, 3660–3669 (2014).
18. Jakobsen, H. B. & Olsen, C. E. Influence of climatic factors on emission of flower volatiles in situ. *Planta* **192**, 365–371 (1994).
19. Majetic, C. J., Fetters, A. M., Beck, O. M., Stachnik, E. F. & Beam, K. M. Petunia floral trait plasticity in response to soil nitrogen content and subsequent impacts on insect visitation. *Flora Morphol. Distrib. Funct. Ecol. Plants* **232**, 183–193 (2017).
20. Kessler, A. & Halitschke, R. Testing the potential for conflicting selection on floral chemical traits by pollinators and herbivores: Predictions and case study. *Funct. Ecol.* **23**, 901–912 (2009).
21. Rusman, Q., Poelman, E. H., Nowrin, F., Polder, G. & Lucas-Barbosa, D. Floral plasticity: Herbivore-species-specific-induced changes in flower traits with contrasting effects on pollinator visitation. *Plant Cell Environ.* **42**, 1882–1896 (2019).
22. Helletsgruber, C., Dötterl, S., Ruprecht, U. & Junker, R. R. Epiphytic bacteria alter floral scent emissions. *J. Chem. Ecol.* **43**, 1073–1077 (2017).
23. Zu, P., Blanckenhorn, W. U. & Schiestl, F. P. Heritability of floral volatiles and pleiotropic responses to artificial selection in *Brassica rapa*. *New Phytol.* **209**, 1208–1219 (2016).
24. Andargie, M. *et al.* Mapping of quantitative trait loci for floral scent compounds in cowpea (*Vigna unguiculata* L.). *Plant Breed.* **133**, 92–100 (2014).

25. Klahre, U. *et al.* Pollinator choice in petunia depends on two major genetic loci for floral scent production. *Curr. Biol.* **21**, 730–739 (2011).
26. Parachnowitsch, A. L. New synthesis: the evolutionary ecology of floral volatiles. *J. Chem. Ecol.* **40**, 859 (2014).
27. Breitskopf, H. *et al.* Pollinator shifts between *Ophrys sphegodes* populations: Might adaptation to different pollinators drive population divergence? *J. Evol. Biol.* **26**, 2197–2208 (2013).
28. Svensson, G. P., Pellmyr, O. & Raguso, R. A. Strong conservation of floral scent composition in two allopatric yuccas. *J. Chem. Ecol.* **32**, 2657–2665 (2006).
29. Schiestl, F. P., Huber, F. K. & Gomez, J. M. Phenotypic selection on floral scent: Trade-off between attraction and deterrence? *Evol. Ecol.* **25**, 237–248 (2011).
30. Parachnowitsch, A. L., Raguso, R. A. & Kessler, A. Phenotypic selection to increase floral scent emission, but not flower size or colour in bee-pollinated *Penstemon digitalis*. *New Phytol.* **195**, 667–675 (2012).
31. Ehrlén, J., Borg-Karlson, A. K. & Kolb, A. Selection on plant optical traits and floral scent: Effects via seed development and antagonistic interactions. *Basic Appl. Ecol.* **13**, 509–515 (2012).
32. Gross, K., Sun, M. & Schiestl, F. P. Why do floral perfumes become different? Region-specific selection on floral scent in a terrestrial orchid. *PLoS One* **11**, 1–18 (2016).
33. Knauer, A. C. & Schiestl, F. P. The effect of pollinators and herbivores on selection for floral signals: a case study in *Brassica rapa*. *Evol. Ecol.* **31**, 285–304 (2017).
34. Chapurlat, E., Ågren, J., Anderson, J., Friberg, M. & Sletvold, N. Conflicting selection on floral scent emission in the orchid *Gymnadenia conopsea*. *New Phytol.* **222**, 2009–2022 (2019).
35. Joffard, N. *et al.* Floral trait differentiation in *Anacamptis coriophora*: Phenotypic selection on scents, but not on colour. *J. Evol. Biol.* **33**, 1028–1038 (2020).
36. Gervasi, D. D. L. & Schiestl, F. P. Real-time divergent evolution in plants driven by pollinators. *Nat. Commun.* **8**, 1–8 (2017).
37. Sun, M., Gross, K. & Schiestl, F. P. Floral adaptation to local pollinator guilds in a terrestrial orchid. *Ann. Bot.* **113**, 289–300 (2014).
38. Vereecken, N. J. & McNeil, J. N. Cheaters and liars: chemical mimicry at its finest. *Can. J. Zool.* **88**, 725–752 (2010).
39. Schiestl, F. P. & Johnson, S. D. Pollinator-mediated evolution of floral signals. *Trends Ecol. Evol.* **28**, 307–315 (2013).
40. Jürgens, A., Wee, S.-L., Shuttleworth, A. & Johnson, S. D. Chemical mimicry of insect oviposition sites: A global analysis of convergence in angiosperms. *Ecol. Lett.* **16**, 1157–1167 (2013).
41. Salzmann, C. C., Nardella, A. M., Cozzolino, S. & Schiestl, F. P. Variability in floral scent in rewarding and deceptive orchids: The signature of pollinator-imposed selection? *Ann. Bot.* **100**, 757–765 (2007).
42. Dormont, L., Joffard, N. & Schatz, B. Intraspecific variation in floral color and odor in orchids. *Int. J. Plant Sci.* **180**, 1036–1058 (2019).
43. Ackerman, J. D., Cuevas, A. A. & Hof, D. Are deception-pollinated species more variable than those offering a reward? *Plant Syst. Evol.* **293**, 91–99 (2011).
44. Neiland, M. R. M. & Wilcock, C. C. Fruit set, nectar reward, and rarity in the Orchidaceae. *Am. J. Bot.* **85**, 1657–1671 (1998).
45. Tremblay, R. L., Ackerman, J. D., Zimmerman, J. K. & Calvo, R. N. Variation in sexual reproduction in orchids and its evolutionary consequences: A spasmodic journey to diversification. *Biol. J. Linn. Soc.* **84**, 1–54 (2005).
46. Trunschke, J., Sletvold, N. & Ågren, J. Interaction intensity and pollinator-mediated selection. *New Phytol.* **214**, 1381–1389 (2017).
47. Sletvold, N. & Ågren, J. There is more to pollinator-mediated selection than pollen limitation. *Evolution (N. Y.)* **68**, 1907–1918 (2014).
48. Ollerton, J. & Diaz, A. Evidence for stabilising selection acting on flowering time in *Arum maculatum* (Araceae): The influence of phylogeny on adaptation. *Oecologia* **119**, 340–348 (1999).
49. Albre, J., Quilichini, A. & Gibernau, M. Pollination ecology of *Arum italicum* (Araceae). *Bot. J. Linn. Soc.* **141**, 205–214 (2003).

50. Kite, G. C. *et al.* Inflorescence odours and pollinators of *Arum* and *Amorphophallus* (Araceae). in *Reproductive Biology* (eds. Owens, S. J. & Rudall, P. J.) 295–315 (Royal Botanic Gardens, 1998).
51. Lack, A. J. & Diaz, A. The pollination of *Arum maculatum* L. - a historical review and new observations. *Watsonia* **18**, 333–342 (1991).
52. Espíndola, A., Pellissier, L. & Alvarez, N. Variation in the proportion of flower visitors of *Arum maculatum* along its distributional range in relation with community-based climatic niche analyses. *Oikos* **120**, 728–734 (2011).
53. Kite, G. C. The floral odour of *Arum maculatum*. *Biochem. Syst. Ecol.* **23**, 343–354 (1995).
54. Diaz, A. & Kite, G. C. A comparison of the pollination ecology of *Arum maculatum* and *Arum italicum* in England. *Watsonia* **24**, 171–181 (2002).
55. Chartier, M., Pélozuelo, L., Buatois, B., Bessièrè, J. M. & Gibernau, M. Geographical variations of odour and pollinators, and test for local adaptation by reciprocal transplant of two European *Arum* species. *Funct. Ecol.* **27**, 1367–1381 (2013).
56. Marotz-Clausen, G. *et al.* Incomplete synchrony of inflorescence scent and temperature patterns in *Arum maculatum* L. (Araceae). *Phytochemistry* **154**, 77–84 (2018).
57. Chartier, M., Pélozuelo, L. & Gibernau, M. Do floral odor profiles geographically vary with the degree of specificity for pollinators? Investigation in two sapromyophilous *Arum* species (Araceae). *Ann. - Soc. Entomol. Fr.* **47**, 71–77 (2011).
58. Szenteczki, M. A. *et al.* Within-species floral odor variation is maintained by spatial and temporal heterogeneity in pollinator communities. Preprint at <https://www.biorxiv.org/content/10.1101/2020.09.29.318089v1> (2020).
59. Espíndola, A. & Alvarez, N. Comparative phylogeography in a specific and obligate pollination antagonism. *PLoS One* **6**, e28662 (2011).
60. Borchsenius, F., Lozada, T. & Knudsen, J. T. Reproductive isolation of sympatric forms of the understory palm *Geonoma macrostachys* in western Amazonia. *Bot. J. Linn. Soc.* **182**, 398–410 (2016).
61. Levin, R. A., Raguso, R. A. & McDade, L. A. Fragrance chemistry and pollinator affinities in Nyctaginaceae. *Phytochemistry* **58**, 429–440 (2001).
62. Gottsberger, G., Silberbauer-Gottsberger, I. & Dötterl, S. Pollination and floral scent differentiation in species of the *Philodendron bipinnatifidum* complex (Araceae). *Plant Syst. Evol.* **299**, 793–809 (2013).
63. Lukas, K., Harig, T., Schulz, S., Hadersdorfer, J. & Dötterl, S. Flowers of European pear release common and uncommon volatiles that can be detected by honey bee pollinators. *Chemoecology* **29**, 211–223 (2019).
64. Kaiser, R. *Scent of the vanishing flora*. (Helvetica Chimica Acta Verlag, 2011).
65. Skubatz, H., Kunkel, D. D., Howald, W. N., Trenkle, R. & Mookherjee, B. The *Sauromatum guttatum* appendix as an osmophore: Excretory pathways, composition of volatiles and attractiveness to insects. *New Phytol.* **134**, 631–640 (1996).
66. Hadacek, F. & Weber, M. Club-shaped organs as additional osmophores within the *Sauromatum* inflorescence: Odour analysis, ultrastructural changes and pollination aspects. *Plant Biol.* **4**, 367–383 (2002).
67. Schlumpberger, B. O. & Raguso, R. A. Geographic variation in floral scent of *Echinopsis ancistrophora* (Cactaceae); evidence for constraints on hawkmoth attraction. *Oikos* **117**, 801–814 (2008).
68. Ayasse, M. *et al.* Evolution of reproductive strategies in the sexually deceptive orchid *Ophrys sphegodes*: How does flower-specific variation of odor signals influence reproductive success? *Evolution*. **54**, 1995–2006 (2000).
69. Laurence, B. R. The larval inhabitants of cow pats. *J. Anim. Ecol.* **23**, 234–260 (1954).
70. Satchell, G. H. The larvae of the British species of *Psychoda* (Diptera: Psychodidae). *Parasitology* **38**, 51–69 (1946).
71. Wagner, R. Zur Kenntnis der Psychodidenfauna des Allgäus. *Nachrichtenblatt der Bayer. Entomol.* **26. Jahrgang**, 23–28 (1977).
72. Vaillant, F. Les Diptères Psychodidae coprophiles et coprobiontes d' Europe. *Bull. Rom. d'Entomologie* **6**, 1–43 (1988).
73. Ježek, J. Redescriptions of nine common palaeartic and holarctic species of psychodini end.

- (diptera: Psychodidae). *Acta Entomol. Musei Natl. Pragae* **43**, 33–83 (1990).
74. Satchell, G. H. The ecology of the British species of *Psychoda* (Diptera: Psychodidae). *Ann. Appl. Biol.* **34**, 611–621 (1947).
  75. Withers, P. & O'Connor, J. P. A preliminary account of the Irish species of moth fly (Diptera: Psychodidae). *Proc. R. Irish Acad. Sect. B Biol. Geol. Chem. Sci.* **92B**, 61–77 (1992).
  76. Sigsgaard, E. E. *et al.* Environmental DNA metabarcoding of cow dung reveals taxonomic and functional diversity of invertebrate assemblages. *Mol. Ecol.* (2020) doi:10.1111/mec.15734.
  77. Johnson, S. D. & Jürgens, A. Convergent evolution of carrion and faecal scent mimicry in fly-pollinated angiosperm flowers and a stinkhorn fungus. *South African J. Bot.* **76**, 796–807 (2010).
  78. Shuttleworth, A. Smells like debauchery: The chemical composition of semen-like, sweat-like and faintly foetid floral odours in *Xysmalobium* (Apocynaceae: Asclepiadoideae). *Biochem. Syst. Ecol.* **66**, 63–75 (2016).
  79. Dormont, L., Jay-Robert, P., Bessièrè, J. M., Rapior, S. & Lumaret, J. P. Innate olfactory preferences in dung beetles. *J. Exp. Biol.* **213**, 3177–3186 (2010).
  80. Stensmyr, M. C. *et al.* Rotting smell of dead-horse arum florets. *Nature* **420**, 625–626 (2002).
  81. Humeau, L. *et al.* Sapromyiophily in the native orchid, *Bulbophyllum variegatum*, on Réunion (Mascarene Archipelago, Indian Ocean). *J. Trop. Ecol.* **27**, 591–599 (2011).
  82. Martos, F. *et al.* Chemical and morphological filters in a specialized floral mimicry system. *New Phytol.* **207**, 225–234 (2015).
  83. Wee, S. L., Tan, S. B. & Jürgens, A. Pollinator specialization in the enigmatic *Rafflesia cantleyi*: A true carrion flower with species-specific and sex-biased blow fly pollinators. *Phytochemistry* **153**, 120–128 (2018).
  84. Scheven, H. J. GC/MS Untersuchungen des Appendixduftes blühender Pflanzen von *Arum maculatum* L. und *Arum italicum* MILLER: Nachweis der attraktiven Wirkung der Duftbestandteile Indol, Humulen und p-Kresol auf *Psychoda phalaenoides* L. *PhD Thesis*. (Philipps-Universität Marburg, 1994).
  85. Kuanprasert, N., Kuehnle, A. R. & Tang, C. S. Floral fragrance compounds of some *Anthurium* (Araceae) species and hybrids. *Phytochemistry* **49**, 521–528 (1998).
  86. Schwerdtfeger, M., Gerlach, G. & Kaiser, R. Anthecology in the neotropical genus *Anthurium* (Araceae). *Selbyana*, **23**, 258–267 (2002).
  87. Majetic, C. J., Raguso, R. A. & Ashman, T. L. Sources of floral scent variation. *Plant Signal. Behav.* **4**, 129–131 (2009).
  88. Herrera, C. M., Castellanos, M. C. & Medrano, M. Geographical context of floral evolution: towards an improved research programme in floral diversification. in *Ecology and Evolution of Flowers* (eds. Harder, L. D. & Barrett, S. C.) 278–294 (Oxford University Press, 2006).
  89. Pianaro, A. *et al.* Stingless bees: Chemical differences and potential functions in *Nannotrigona testaceicornis* and *Plebeia droryana* males and workers. *J. Chem. Ecol.* **35**, 1117–1128 (2009).
  90. Grajales-Conesa, J., Rojas, J. C., Guzmán-Díaz, M., Rincón-Rabanales, M. & Cruz-López, L. Cephalic and dufour gland secretions of *Scaptotrigona mexicana* queens: Chemical composition and biological activity. *Apidologie* **38**, 38–46 (2007).
  91. Heiduk, A. *et al.* *Ceropegia sandersonii* mimics attacked honeybees to attract kleptoparasitic flies for pollination. *Curr. Biol.* **26**, 2787–2793 (2016).
  92. Censier, F. *et al.* Identification of 1-methyloctyl butanoate as the major sex pheromone component from females of the saddle gall midge, *Haplodiplosis marginata* (Diptera: Cecidomyiidae). *Chemoecology* **24**, 243–251 (2014).
  93. Löfstedt, C., Hansson, B. S., Petersson, E., Valeur, P. & Richards, A. Pheromonal secretions from glands on the 5th abdominal sternite of hydroptychid and rhyacophilid caddisflies (Trichoptera). *J. Chem. Ecol.* **20**, 153–170 (1994).
  94. Wheeler, G. S., Massey, L. M. & Southwell, I. A. Antipredator defense of biological control agent *Oxyops vitiosa* is mediated by plant volatiles sequestered from the host plant *Melaleuca quinquenervia*. *J. Chem. Ecol.* **28**, 297–315 (2002).
  95. Geiselhardt, S., Schmitt, T. & Peschke, K. Chemical composition and pheromonal function of the defensive secretions in the subtribe *Stizopina* (Coleoptera, Tenebrionidae, Opatrini). *Chemoecology* **19**, 1–6 (2009).
  96. Ômura, H., Honda, K. & Feeny, P. From terpenoids to aliphatic acids: Further evidence for late-instar switch in osmeterial defense as a characteristic trait of swallowtail butterflies in the tribe

- papilionini. *J. Chem. Ecol.* **32**, 1999–2012 (2006).
97. Yatagai, M., Makihara, H. & Oba, K. Volatile components of Japanese cedar cultivars as repellents related to resistance to *Cryptomeria* bark borer. *J. Wood Sci.* **48**, 51–55 (2002).
  98. Pettersson, E. M., Sullivan, B. T., Anderson, P., Berisford, C. W. & Birgersson, G. Odor perception in the bark beetle parasitoid *Roptrocercus xylophagorum* exposed to host associated volatiles. *J. Chem. Ecol.* **26**, 2507–2525 (2000).
  99. Baur, R., Feeny, P. & Städler, E. Oviposition stimulants for the black swallowtail butterfly: Identification of electrophysiologically active compounds in carrot volatiles. *J. Chem. Ecol.* **19**, 919–937 (1993).
  100. Fletcher, M. T. *et al.* Chemistry of fruit-flies. Spiroacetal-rich secretions in several *Bacfroccera* species from the south-west pacific region. *J. Chem. Soc. Perkin Trans.* **1** 2827–2831 (1992).
  101. Shuttleworth, A. & Johnson, S. D. The missing stink: Sulphur compounds can mediate a shift between fly and wasp pollination systems. *Proc. R. Soc. B Biol. Sci.* **277**, 2811–2819 (2010).
  102. Jürgens, A., Dötterl, S. & Meve, U. The chemical nature of fetid floral odours in stapeliads (Apocynaceae-Asclepiadoideae-Ceropegieae). *New Phytol.* **172**, 452–468 (2006).
  103. Sládeček, F. X., Dötterl, S., Schäffler, I., Segar, S. & Konvicka, M. Succession of dung-inhabiting beetles and flies reflects the succession of dung-emitted volatile compounds. *J. Chem. Ecol.* (2021). *In press*.
  104. Henning, J. A., Peng, Y.-S., Montague, M. A. & Teuber, L. R. Honey bee (Hymenoptera: Apidae) behavioral response to primary *Alfalfa* (Rosales: Fabaceae) floral volatiles. *J. Econ. Entomol.* **85**, 233–239 (1992).
  105. Terry, L. I., Walter, G. H., Moore, C., Roemer, R. & Hull, C. Odor-mediated push-pull pollination in cycads. *Science* **318**, 70 (2007).
  106. Galen, C., Kaczorowski, R., Todd, S. L., Geib, J. & Raguso, R. A. Dosage-dependent impacts of a floral volatile compound on pollinators, larcenists, and the potential for floral evolution in the Alpine skypilot *Polemonium viscosum*. *Am. Nat.* **177**, 258–272 (2011).
  107. Stinchcombe, J. R., Agrawal, A. F., Hohenlohe, P. A., Arnold, S. J. & Blows, M. W. Estimating nonlinear selection gradients using quadratic regression coefficients: Double or nothing? *Evolution* **62**, 2435–2440 (2008).
  108. Boyce, P. C. *Arum* – a Decade of Change. *Aroideana* **29**, 132–137 (2006).
  109. Bedalov, M. & Kupfer, P. Studies on the genus *Arum* (Araceae). *Bull. la Société Neuchâteloise des Sci. Nat.* **128**, 43–70 (2005).
  110. Bermadinger-Stabentheiner, E. & Stabentheiner, A. Dynamics of thermogenesis and structure of epidermal tissues in inflorescences of *Arum maculatum*. *New Phytol.* **131**, 41–50 (1995).
  111. Gibernau, M., Macquart, D. & Przetak, G. Pollination in the genus *Arum* – a review. *Aroideana* **27**, 148–166 (2004).
  112. Snow, B. & Snow, D. *Birds and Berries*. (T & AD Poyser Limited, 1988).
  113. Kováts, E. & Weisz, P. Über den Retentionsindex und seine Verwendung zur Aufstellung einer Polaritätsskala für Lösungsmittel. *Berichte der Bunsengesellschaft für Phys. Chemie* **69**, 812 – 820 (1965).
  114. Adams, R. P. *Identification of essential oil components by gas chromatography/mass spectrometry*. (Allured Publishing Corporation, 2007).
  115. Anderson, M. J. A new method for non-parametric multivariate analysis of variance. *Austral Ecol.* **26**, 32 – 46 (2001).
  116. Oksanen, J. *et al.* Vegan: community ecology package. *CRAN* (2019).
  117. Anderson, M. J. & Willis, T. J. Canonical analysis of principal coordinates: A useful method of constrained ordination for ecology. *Ecology* **84**, 511–525 (2003).
  118. Campbell, D. R., Jürgens, A. & Johnson, S. D. Reproductive isolation between *Zaluzianskya* species: The influence of volatiles and flower orientation on hawkmoth foraging choices. *New Phytol.* **210**, 333–342 (2016).
  119. Powers, J. M. *et al.* Floral scent composition and fine-scale timing in two moth-pollinated Hawaiian *Schiedea* (Caryophyllaceae). *Front. Plant Sci.* **11**, 1–16 (2020).
  120. Benjamini, Y. & Hochberg, Y. Controlling the false discovery rate: A practical and powerful approach to multiple testing. *J. R. Stat. Soc. B* **57**, 289–300 (1995).
  121. Breiman, L. Random Forests. *Mach. Learn.* **45**, 5–32 (2001).
  122. Liaw, A. & Wiener, M. Classification and regression by randomForest. *R News* **2**, 18–22 (2002).

123. Ranganathan, Y. & Borges, R. M. Reducing the babel in plant volatile communication: Using the forest to see the trees. *Plant Biol.* **12**, 735–742 (2010).
124. Lande, R. & Arnold, S. J. The measurement of selection on correlated characters. *Evolution (N. Y.)*. **37**, 1210-1226. (1983).
125. Zou, H. & Hastie, T. Regularization and variable selection via the elastic net. *J. R. Stat. Soc. Ser. B Stat. Methodol.* **67**, 301–320 (2005).
126. Kursa, M. B. & Rudnicki, W. R. Feature selection with the Boruta package. *J. Stat. Softw.* **36**, 1–13 (2010).
127. Hogg, R. V., McKean, J. W. & Craig, A. T. *Introduction to Mathematical Statistics. Journal of Visual Languages & Computing* vol. 11 (Pearson, 2019).
128. Cook, R. D. & Weisberg, S. *Residuals and influence in regression*. (Chapman and Hall, 1982).
129. Fox, J. & Weisberg, S. *An R companion to applied regression*. (Sage Publications, 2019).
130. Quinn, G. P. & Keough, M. J. *Experimental design and data analysis for biologists*. (Cambridge University Press, 2002).
131. R Core Team. R: A language and environment for statistical computing. (2015). <http://www.r-project.org/>.
132. Amante, C. & Eakins, B. W. ETOPO1 1 Arc-minute global relief model: Procedures, data sources and analysis. *NOAA Tech. Memo. NESDIS NGDC-24*, 1–19 (2009)

## Figures

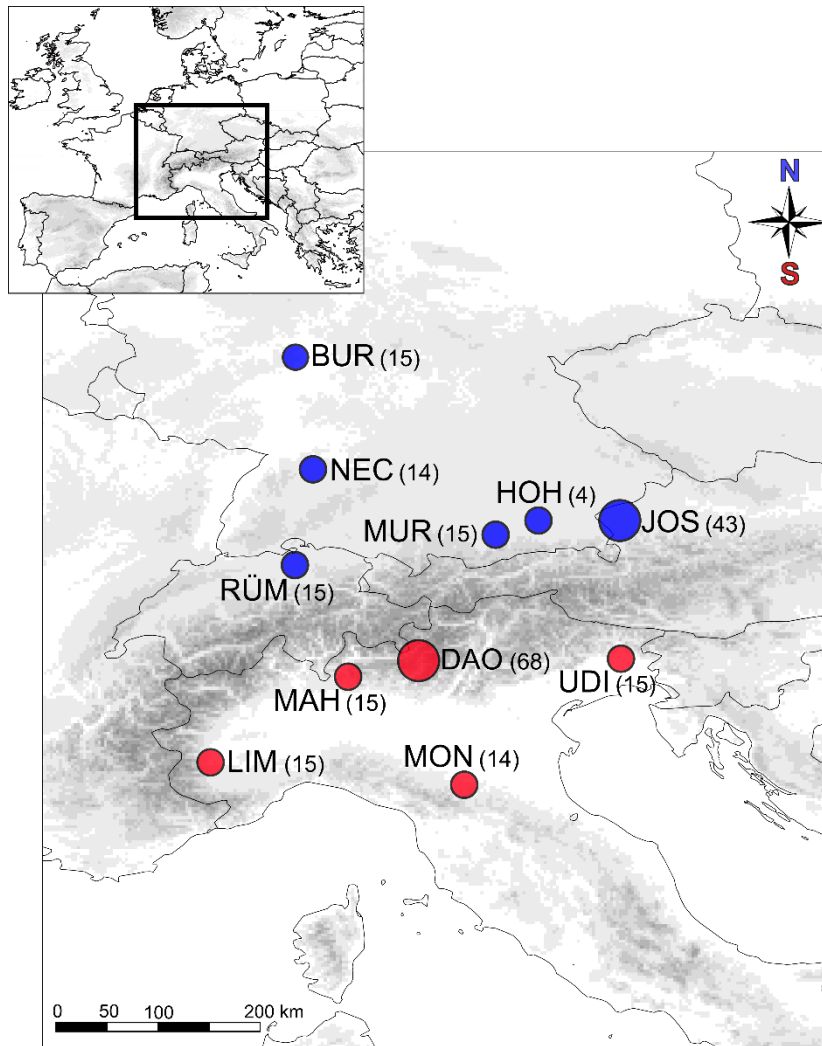

**Fig 1**

Sampling localities of *Arum maculatum* from north (blue) vs. south (red) of the Alps. Numbers in brackets give the number of individuals used for scent (and selection) analyses. The two most extensively sampled populations (JOS, DAO) are indicated by larger circles. *North*: JOS, Josefiaw; BUR, Burg Hohenstein; HOH, Hohendilching; MUR, Murnau; NEC, Horb am Neckar; RÜM, Rümikon; *South*: DAO, Daone; LIM, Limone-Piemonte; MAH, Santa Maria Hoè; MON, Montese; UDI, Udine. The map was prepared using the ETOPO1 Global Relief Model<sup>132</sup> and ArcGIS v.10.4 (ESRI, Redland, CA).



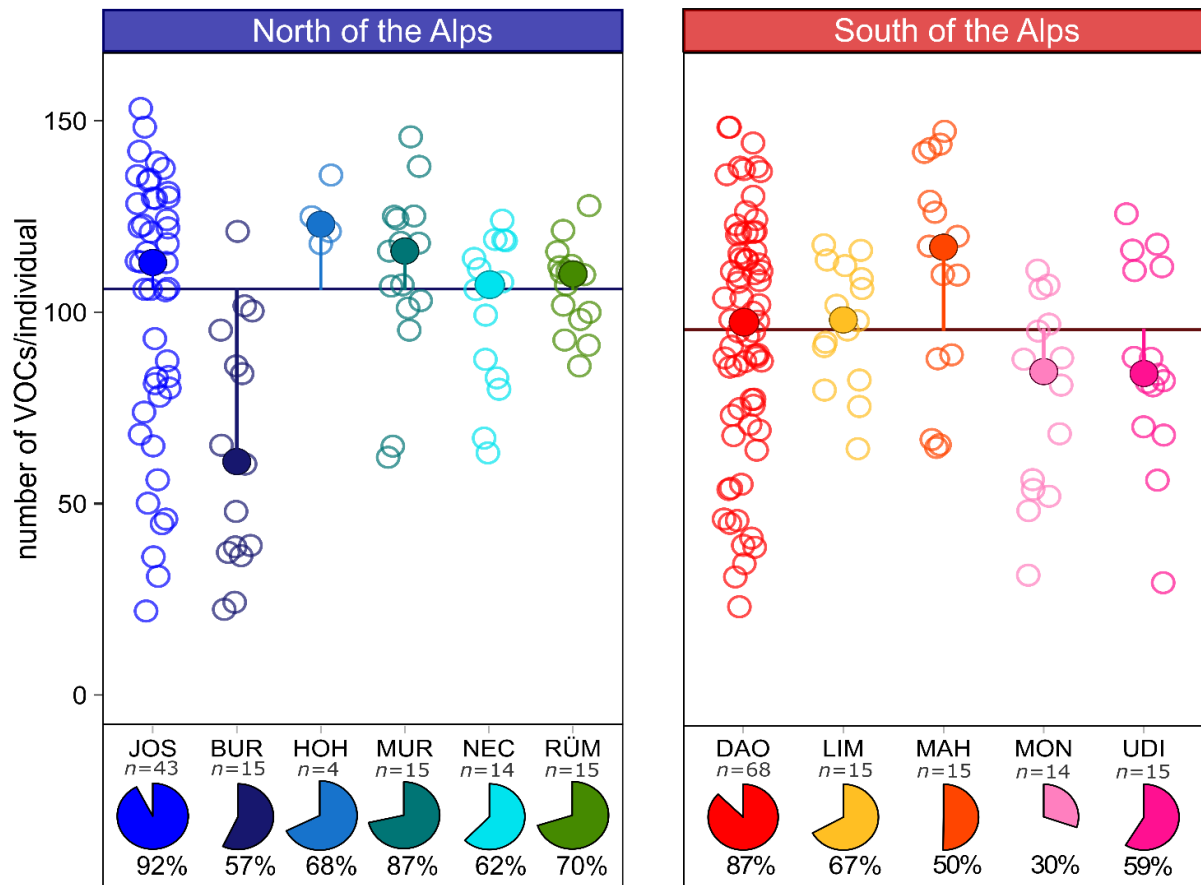

**Fig 2**

Number of floral scent compounds recorded in *Arum maculatum* individuals from populations north and south of the Alps, respectively. Filled circles denote the population median of number of volatiles per individual; the vertical lines indicate the distance to the region median (horizontal line); and open circles mark the number of volatiles detected in the individual samples. Pie charts indicate the percentage of volatiles detected per population ( $n$ , sample size) compared to the number of compounds detected across all samples (291 compounds). See Fig. 1 and Table S1 for identification of population codes.

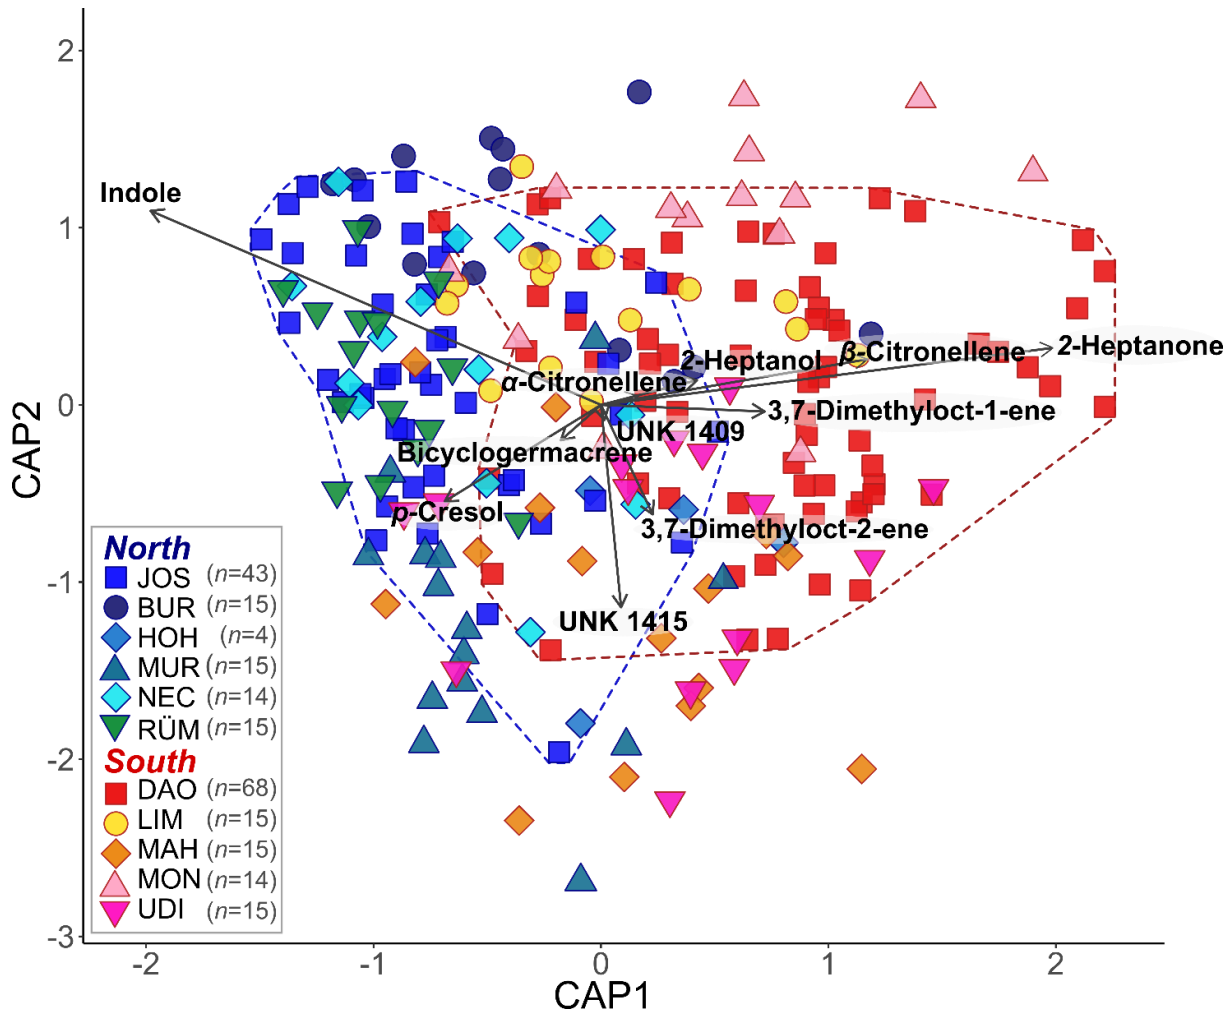

**Fig 3**

Canonical analysis of principal coordinates (CAP) based on a Bray–Curtis dissimilarity matrix of relative floral scent in *Arum maculatum* individuals from populations north and south of the Alps, respectively. *N* denotes the sample size per population. The vectors depict the volatiles most correlating with the *capscale* scores. The colored dashed lines delineate the individual scent variation of the two most extensive sampled populations JOS (blue) and DAO (red). See Fig. 1 and Table S1 for identification of population codes.

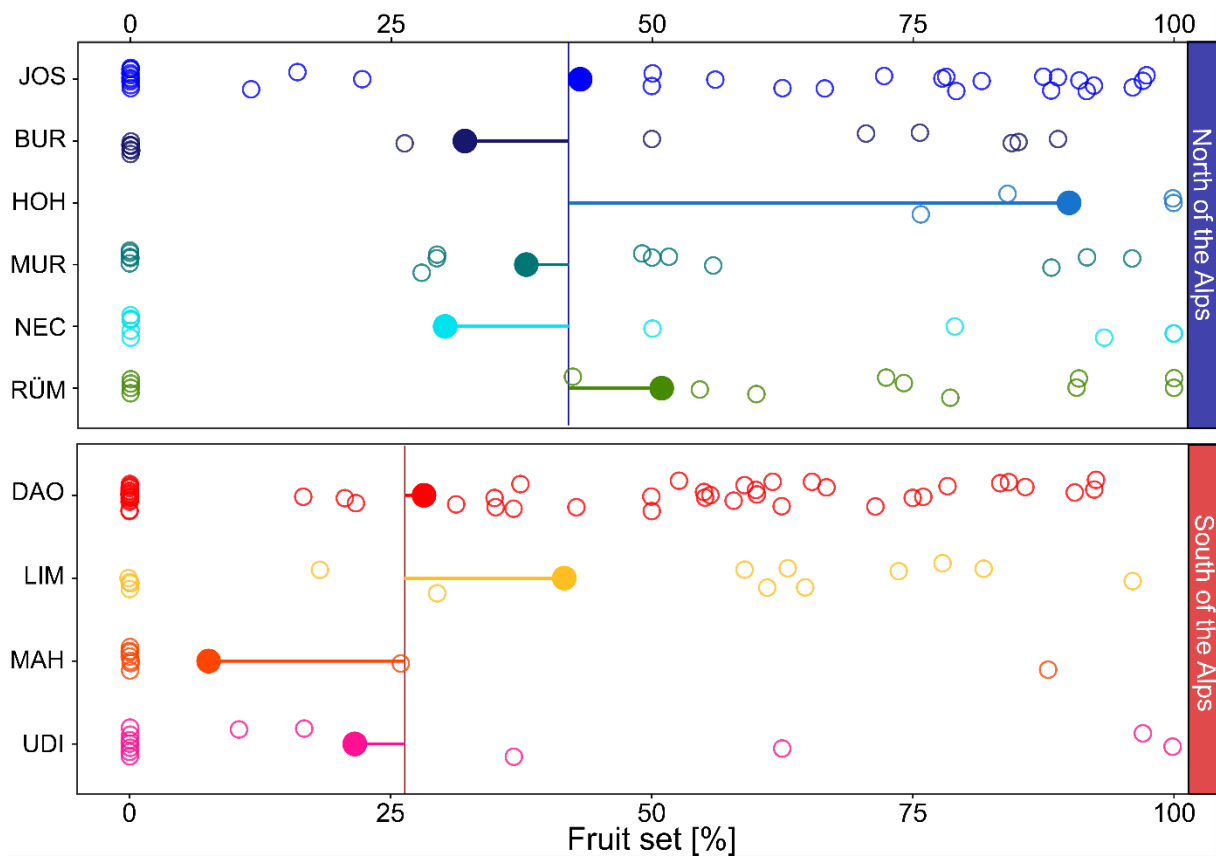

**Fig 4**

Fruit set (% female flowers that developed into fruits) of *Arum maculatum* individuals from populations north and south of the Alps, respectively. Filled circles denote the population mean of fruit set; horizontal lines indicate the distance to the region mean (vertical line); and the open circles mark the fruit set of each individual. See Fig. 1 and Table S1 for identification of population codes.

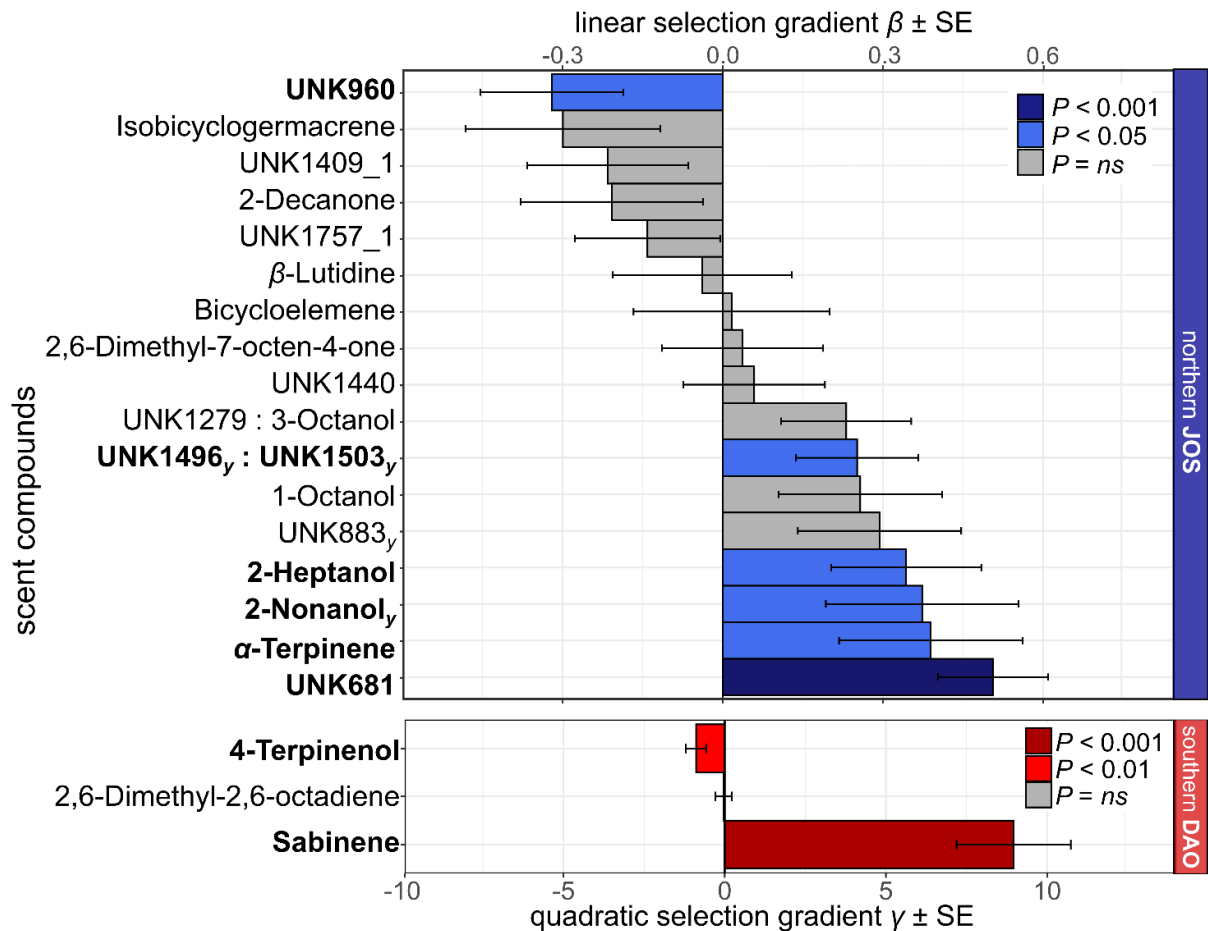

**Fig 5**

Linear selection gradients  $\beta$  and nonlinear quadratic selection gradients  $\gamma$  (and their standard errors, SE) for individual floral scent compounds in the most extensively sampled *Arum maculatum* populations from north (JOS, blue,  $n = 43$ ) and south (DAO, red,  $n = 68$ ) of the Alps, respectively. Only compounds that correlated with relative fruit in the elastic net/*Boruta* analyses are shown (see Material and Methods). Scent compounds under significant selection ( $P < 0.05$ ) are in bold and their bars are coloured. Note the different scaling for linear ( $\beta$ ) and nonlinear ( $\gamma$ ) selection. For the northern population, compounds that were also detected by the nonlinear *Boruta* analyses are indicated with a subscript ( $\gamma$ ).

## Tables

**Table 1** Median amounts of total absolute and relative (contribution of single compounds to total scent) inflorescence scent of *Arum maculatum* surveyed in six and five populations north and south of the Alps, respectively. North and South columns (bold headers) present the regional median of the corresponding populations (following columns). Volatiles with a median amount of <1% in any population are pooled.

| KRI  | Compound name                                                                                   | <b>North</b><br>(n=106) | JOS<br>(n=43) | BUR<br>(n=15) | HOH<br>(n=4) | MUR<br>(n=15) | NEC<br>(n=14) | RUM<br>(n=15) | <b>South</b><br>(n=127) | DAO<br>(n=68) | LIM<br>(n=15) | MAH<br>(n=15) | MON<br>(n=14) | UDI<br>(n=15) |
|------|-------------------------------------------------------------------------------------------------|-------------------------|---------------|---------------|--------------|---------------|---------------|---------------|-------------------------|---------------|---------------|---------------|---------------|---------------|
|      | Median total absolute amount of scent trapped (ng inflorescence <sup>-1</sup> h <sup>-1</sup> ) | 67.4                    | 167.2         | 13.0          | 565.8        | 80.7          | 39.4          | 41.7          | 214.7                   | 311.4         | 203.8         | 196.9         | 201.4         | 42.3          |
|      | Total number of volatiles                                                                       | 283                     | 269           | 166           | 197          | 204           | 181           | 208           | 265                     | 254           | 195           | 146           | 88            | 171           |
|      | Aliphatic components                                                                            |                         |               |               |              |               |               |               |                         |               |               |               |               |               |
| 893  | 2-Heptanone*                                                                                    | 1.4                     | 1.4           | 2.4           | 0.8          | 1.3           | 1.1           | 1.4           | 6.9                     | 9.3           | 0.3           | 2.9           | 11.9          | 4.0           |
| 902  | 2-Heptanol*                                                                                     | 0.1                     | 0.1           | 0.3           | 0.3          | 0.2           | 0.2           | 0.1           | 1.2                     | 1.9           | tr            | 0.8           | 2.5           | 0.5           |
| 982  | 1-Octen-3-ol*                                                                                   | 1.9                     | 2.4           | tr            | 2.3          | 2.0           | 1.8           | 1.3           | 0.3                     | 0.4           | tr            | 6.4           | tr            | 1.3           |
| 1096 | 2-Nonanone*                                                                                     | 0.2                     | 0.1           | 0.1           | 0.1          | 0.2           | 0.1           | 0.2           | 0.7                     | 0.9           | tr            | 0.2           | 1.3           | 0.4           |
|      | 23 more aliphatic components <1%                                                                | 0.5                     | 0.5           | 0.4           | 2.0          | 1.7           | 1.3           | 0.5           | 0.7                     | 0.9           | 0.9           | 2.0           | 1.0           | 0.7           |
|      | Aromatic components                                                                             |                         |               |               |              |               |               |               |                         |               |               |               |               |               |
| 1076 | <i>p</i> -Cresol*                                                                               | 4.2                     | 1.8           | 0.1           | 19.4         | 11.9          | 9.2           | 1.5           | 0.5                     | 0.5           | 0.3           | 0.7           | 0.6           | 0.9           |
|      | 4 more aromatic components <1%                                                                  | tr                      | tr            | tr            | 0.6          | 0.3           | 0.1           | 0.1           | tr                      | tr            | tr            | 0.1           | tr            | tr            |
|      | C5-branched chain components                                                                    |                         |               |               |              |               |               |               |                         |               |               |               |               |               |
|      | 4 C5-branched chain components <1%                                                              | tr                      | tr            | tr            | 0.1          | tr            | 0.2           | 0.1           | tr                      | tr            | tr            | tr            | tr            | tr            |
|      | Nitrogen-bearing components                                                                     |                         |               |               |              |               |               |               |                         |               |               |               |               |               |
| 965  | $\beta$ -Lutidine                                                                               | 0.2                     | 0.1           | 0.7           | 0.2          | 0.4           | 0.4           | 0.3           | 0.1                     | tr            | 0.6           | 0.1           | tr            | 1.3           |
| 1310 | Indole*                                                                                         | 24.2                    | 22.3          | 20.8          | 12.6         | 24.6          | 33.4          | 35.6          | 11.9                    | 11.9          | 24.8          | 8.8           | 12.3          | 9.5           |
|      | 5 more nitrogen-bearing components <1%                                                          | 0.1                     | 0.1           | tr            | 0.1          | tr            | tr            | 0.3           | 0.1                     | tr            | 0.1           | 0.1           | tr            | tr            |
|      | Irregular terpene                                                                               |                         |               |               |              |               |               |               |                         |               |               |               |               |               |
|      | 3 irregular terpenes <1%                                                                        | tr                      | tr            | 0.4           | 0.3          | tr            | 0.6           | 0.1           | 0.1                     | 0.1           | 0.2           | tr            | 0.3           | 0.1           |
|      | Monoterpenoids                                                                                  |                         |               |               |              |               |               |               |                         |               |               |               |               |               |
| 914  | 3,7-Dimethyloct-1-ene*                                                                          | 1.5                     | 1.2           | 1.1           | 2.6          | 2.1           | 1.8           | 1.7           | 4.0                     | 4.3           | 4.1           | 2.4           | 4.6           | 2.7           |

|                   |                                          |     |     |     |      |     |     |     |     |      |      |      |     |      |
|-------------------|------------------------------------------|-----|-----|-----|------|-----|-----|-----|-----|------|------|------|-----|------|
| 935               | $\alpha$ -Citronellene*§                 | 0.4 | 0.3 | 0.5 | 0.9  | 0.5 | 0.5 | 0.4 | 1.3 | 1.3  | 1.9  | 1.1  | 1.3 | 1.0  |
| 949               | $\beta$ -Citronellene*§                  | 4.2 | 3.5 | 8.0 | 11.6 | 3.4 | 7.1 | 3.5 | 9.7 | 10.8 | 10.1 | 6.5  | 9.9 | 8.2  |
| 972               | 3,7-Dimethyloct-2-ene*                   | 3.1 | 1.8 | 2.8 | 5.1  | 9.6 | 2.6 | 3.3 | 4.3 | 4.5  | 4.4  | 5.6  | 2.1 | 3.2  |
| 982               | Sabinene*                                | 0.2 | tr  | 1.0 | 0.2  | tr  | 0.4 | 0.4 | 0.4 | 0.3  | 1.4  | 0.3  | 1.2 | tr   |
| 1005              | 2,6-Dimethylocta-2,6-diene*              | 1.2 | 0.9 | 1.0 | 3.4  | 4.1 | 1.0 | 1.5 | 1.7 | 1.8  | 1.7  | 1.9  | 0.5 | 1.6  |
| 1076              | Dihydromyrcenol                          | tr  | tr  | tr  | tr   | tr  | tr  | tr  | 0.4 | 0.4  | 1.0  | tr   | 0.2 | 0.5  |
|                   | 21 more monoterpenoids <1%               | 0.3 | 0.4 | tr  | 2.2  | 0.9 | 0.6 | 0.9 | 0.6 | 0.7  | 1.9  | 1.2  | 0.4 | 1.1  |
| Sesquiterpenoids  |                                          |     |     |     |      |     |     |     |     |      |      |      |     |      |
| 1357              | Bicycloelemene                           | 0.4 | 0.5 | 0.1 | 0.5  | 1.9 | 0.1 | 0.5 | 0.2 | 0.1  | 0.2  | 0.6  | 0.1 | 0.9  |
| 1399              | $\alpha$ -Copaene*                       | 1.0 | 1.8 | 1.3 | 0.5  | 0.5 | 0.7 | 0.8 | 0.8 | 0.6  | 1.0  | 1.0  | 1.6 | 0.6  |
| 1434              | Isocaryophyllene                         | 0.9 | 1.3 | 0.7 | 0.4  | 0.6 | 0.5 | 1.1 | 0.9 | 0.7  | 1.2  | 1.3  | 1.2 | 0.8  |
| 1450              | $\beta$ -Caryophyllene*                  | 3.0 | 5.5 | 3.0 | 2.3  | 1.4 | 2.7 | 2.7 | 2.9 | 2.2  | 3.0  | 4.0  | 5.3 | 2.8  |
| 1484              | $\alpha$ -Humulene*                      | 2.8 | 4.7 | 2.8 | 1.7  | 1.2 | 2.3 | 2.7 | 2.3 | 1.6  | 2.5  | 3.0  | 4.0 | 2.6  |
| 1501              | Germacrene D*                            | 0.9 | 1.3 | 1.4 | 0.3  | 0.3 | 0.9 | 0.7 | 0.5 | 0.3  | 0.5  | 0.7  | 1.3 | 0.7  |
| 1520              | Bicyclogermacrene                        | 0.9 | 1.0 | tr  | 0.6  | 2.1 | tr  | 1.3 | 0.4 | 0.2  | 0.2  | 1.3  | tr  | 1.7  |
| 1547              | $\delta$ -Cadinene                       | 1.2 | 1.9 | 1.4 | 0.6  | 0.6 | 1.5 | 1.1 | 0.4 | 0.3  | 0.5  | 0.7  | 0.4 | 1.0  |
|                   | 10 more sesquiterpenoids <1%             | 0.4 | 0.5 | 0.3 | 0.4  | 0.3 | 0.5 | 0.6 | 0.3 | 0.1  | 0.3  | 0.4  | 0.7 | 0.3  |
| Unknown compounds |                                          |     |     |     |      |     |     |     |     |      |      |      |     |      |
| 829               | UNK 829 <i>m/z</i> : 54,67,110,41,81,39  | 0.3 | 0.8 | tr  | 0.2  | 0.2 | 0.3 | 0.1 | tr  | tr   | tr   | 2.0  | tr  | 0.3  |
| 1394              | UNK 1394 <i>m/z</i> : 69,55,41,82,95     | 0.2 | 0.2 | tr  | 0.1  | 0.6 | 0.2 | 0.2 | 0.1 | 0.1  | 0.1  | 1.1  | 0.2 | 0.1  |
| 1409              | UNK 1409_1 <i>m/z</i> : 81,55,67,95,41   | 0.2 | 0.2 | tr  | 0.4  | 0.4 | 0.1 | 0.1 | 0.2 | 0.2  | 0.1  | 0.6  | 0.2 | 1.1  |
| 1415              | UNK 1415 <i>m/z</i> : 69, 81,41,95,55    | 3.7 | 3.9 | 1.7 | 2.3  | 7.3 | 3.7 | 3.4 | 3.8 | 3.1  | 2.8  | 10.4 | 2.3 | 11.3 |
| 1492              | UNK 1492 <i>m/z</i> : 105,161,91,41,93   | 1.7 | 2.7 | 1.4 | 0.3  | 0.5 | 0.5 | 1.8 | 1.2 | 1.0  | 1.4  | 1.6  | 3.1 | 0.6  |
| 1503              | UNK 1503 <i>m/z</i> : 81,107,163         | 0.8 | 0.9 | 0.2 | 0.4  | 0.8 | 0.6 | 1.0 | 0.2 | 0.2  | 0.1  | 0.4  | 0.2 | 0.3  |
| 1524              | UNK 1524 <i>m/z</i> : 105,161,204,119,93 | 0.7 | 1.0 | 1.3 | 0.2  | 0.2 | 0.8 | 0.7 | 0.4 | 0.2  | 0.4  | 0.5  | 0.9 | 0.5  |
| 1699              | UNK 1699 <i>m/z</i> : 81,163,191,95,123  | 3.6 | 4.1 | 3.0 | 0.5  | 1.8 | 3.2 | 5.2 | 1.3 | 1.1  | 1.6  | 2.0  | 0.8 | 3.2  |
|                   | 192 more unknowns <1%                    | 2.9 | 3.9 | 1.6 | 4.7  | 4.9 | 3.8 | 4.9 | 2.7 | 2.2  | 4.8  | 4.6  | 3.4 | 3.7  |

Volatiles are ordered according to compound class, and within class by Kováts' retention index (KRI). The total number of volatiles is also given.

Abbreviations: \* = identification of compound was verified by authentic standards; tr = trace relative amount (<0.05%); *m/z* = mass-to-charge ratio in decreasing order of abundance. North: JOS, Josefiu; BUR, Burg Hohenstein; HOH, Hohendilching; MUR, Murnau; NEC, Horb am Neckar; RÜM, Rümikon; South: DAO, Daone; LIM, Limone-Piemonte; MAH, Santa Maria Hoè; MON, Montese; UDI, Udine.

§ Synthetic (+)- $\alpha$ - and (+)- $\beta$ -Citronellene coeluted with natural detected  $\alpha$ - and  $\beta$ -Citronellene on a chiral column (MEGA-DEX DMT Beta SE, 30m  $\times$  0.25mm ID, 0.23 $\mu$ m film) (Gfrerer *et al.* unpublished).
